# Supplementary material for: Improving regional care in the last year of life by setting up a pragmatic evidence-based Plan–Do–Study–Act cycle: results from a cross-sectional survey
Source: PubMed Central journal article supplement — BMJ Open. 2020 Nov 24;10(11):e035988. doi: 10.1136/bmjopen-2019-035988 (PMC7689073; doi:10.1136/bmjopen-2019-035988), 2020-11-24
Supplement: bmjopen-2019-035988.draft_revisions.pdf [file bmjopen-2019-035988.draft_revisions.pdf]

# BMJ Open

BMJ Open is committed to open peer review. As part of this commitment we make the peer review history of every article we publish publicly available.

When an article is published we post the peer reviewers' comments and the authors' responses online. We also post the versions of the paper that were used during peer review. These are the versions that the peer review comments apply to.

The versions of the paper that follow are the versions that were submitted during the peer review process. They are not the versions of record or the final published versions. They should not be cited or distributed as the published version of this manuscript.

BMJ Open is an open access journal and the full, final, typeset and author-corrected version of record of the manuscript is available on our site with no access controls, subscription charges or pay-per-view fees (<http://bmjopen.bmj.com>).

If you have any questions on BMJ Open's open peer review process please email [info.bmjopen@bmj.com](mailto:info.bmjopen@bmj.com)

# BMJ Open

## Improving regional care in the last year of life by setting up a pragmatic evidence-based double loop Plan-Do-Study-Act cycle: Results from a cross-sectional survey

|                               |                                                                                                                                                                                                                                                                                                                                                                                                                                                                                                                                                                                                                                                                                                                                                                                                                                                                                                                                                                                                                                                                                                                                                                                                                                                                                                                                                                                                     |
|-------------------------------|-----------------------------------------------------------------------------------------------------------------------------------------------------------------------------------------------------------------------------------------------------------------------------------------------------------------------------------------------------------------------------------------------------------------------------------------------------------------------------------------------------------------------------------------------------------------------------------------------------------------------------------------------------------------------------------------------------------------------------------------------------------------------------------------------------------------------------------------------------------------------------------------------------------------------------------------------------------------------------------------------------------------------------------------------------------------------------------------------------------------------------------------------------------------------------------------------------------------------------------------------------------------------------------------------------------------------------------------------------------------------------------------------------|
| Journal:                      | <i>BMJ Open</i>                                                                                                                                                                                                                                                                                                                                                                                                                                                                                                                                                                                                                                                                                                                                                                                                                                                                                                                                                                                                                                                                                                                                                                                                                                                                                                                                                                                     |
| Manuscript ID                 | bmjopen-2019-035988                                                                                                                                                                                                                                                                                                                                                                                                                                                                                                                                                                                                                                                                                                                                                                                                                                                                                                                                                                                                                                                                                                                                                                                                                                                                                                                                                                                 |
| Article Type:                 | Original research                                                                                                                                                                                                                                                                                                                                                                                                                                                                                                                                                                                                                                                                                                                                                                                                                                                                                                                                                                                                                                                                                                                                                                                                                                                                                                                                                                                   |
| Date Submitted by the Author: | 25-Nov-2019                                                                                                                                                                                                                                                                                                                                                                                                                                                                                                                                                                                                                                                                                                                                                                                                                                                                                                                                                                                                                                                                                                                                                                                                                                                                                                                                                                                         |
| Complete List of Authors:     | <p>Voltz, Raymond; University of Cologne, Faculty of Medicine and University Hospital, Department of Palliative Medicine</p> <p>Dust, Gloria; University of Cologne, Faculty of Medicine and University Hospital, Department of Palliative Medicine</p> <p>Schippel, Nicolas; University of Cologne, Faculty of Human Sciences and Faculty of Medicine, Institute for Medical Sociology, Health Services Research, and Rehabilitation Science</p> <p>Hamacher, Stefanie; University of Cologne, Faculty of Medicine and University Hospital, Institute of Medical Statistics and Computational Biology</p> <p>Payne, Sheila; University of Lancaster, Lancaster University, Faculty of Health and Medicine, Division of Health Research</p> <p>Scholten, Nadine; University of Cologne, Faculty of Human Sciences and Faculty of Medicine, Institute for Medical Sociology, Health Services Research, and Rehabilitation Science</p> <p>Pfaff, Holger; University of Cologne, Faculty of Human Sciences and Faculty of Medicine, Institute for Medical Sociology, Health Services Research, and Rehabilitation Science</p> <p>Rietz, Christian; Heidelberg University of Education, , Faculty of Educational and Social Sciences, Department of Educational Science</p> <p>Strupp, Julia; University of Cologne, Faculty of Medicine and University Hospital, Department of Palliative Medicine</p> |
| Keywords:                     | Adult palliative care < PALLIATIVE CARE, Quality in health care < HEALTH SERVICES ADMINISTRATION & MANAGEMENT, Change management < HEALTH SERVICES ADMINISTRATION & MANAGEMENT                                                                                                                                                                                                                                                                                                                                                                                                                                                                                                                                                                                                                                                                                                                                                                                                                                                                                                                                                                                                                                                                                                                                                                                                                      |

SCHOLARONE™  
Manuscripts

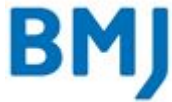

I, the Submitting Author has the right to grant and does grant on behalf of all authors of the Work (as defined in the below author licence), an exclusive licence and/or a non-exclusive licence for contributions from authors who are: i) UK Crown employees; ii) where BMJ has agreed a CC-BY licence shall apply, and/or iii) in accordance with the terms applicable for US Federal Government officers or employees acting as part of their official duties; on a worldwide, perpetual, irrevocable, royalty-free basis to BMJ Publishing Group Ltd ("BMJ") its licensees and where the relevant Journal is co-owned by BMJ to the co-owners of the Journal, to publish the Work in this journal and any other BMJ products and to exploit all rights, as set out in our [licence](#).

The Submitting Author accepts and understands that any supply made under these terms is made by BMJ to the Submitting Author unless you are acting as an employee on behalf of your employer or a postgraduate student of an affiliated institution which is paying any applicable article publishing charge ("APC") for Open Access articles. Where the Submitting Author wishes to make the Work available on an Open Access basis (and intends to pay the relevant APC), the terms of reuse of such Open Access shall be governed by a Creative Commons licence – details of these licences and which [Creative Commons](#) licence will apply to this Work are set out in our licence referred to above.

Other than as permitted in any relevant BMJ Author's Self Archiving Policies, I confirm this Work has not been accepted for publication elsewhere, is not being considered for publication elsewhere and does not duplicate material already published. I confirm all authors consent to publication of this Work and authorise the granting of this licence.

1  
2  
3  
4  
5  
6  
7  
8  
9  
10  
11  
12  
13  
14  
15  
16  
17  
18  
19  
20  
21  
22  
23  
24  
25  
26  
27  
28  
29  
30  
31  
32  
33  
34  
35  
36  
37  
38  
39  
40  
41  
42  
43  
44  
45  
46  
47  
48  
49  
50  
51  
52  
53  
54  
55  
56  
57  
58  
59  
60

## Improving regional care in the last year of life by setting up a pragmatic evidence-based double loop Plan-Do-Study-Act cycle: Results from a cross-sectional survey

**Raymond Voltz<sup>\*1,2,3,4</sup>, Gloria Dust<sup>\*1</sup>, Nicolas Schippel<sup>5</sup>, Stefanie Hamacher<sup>6</sup>, Sheila Payne<sup>7</sup>, Nadine Scholten<sup>5</sup>, Holger Pfaff<sup>4,5</sup>, Christian Rietz<sup>8</sup>, Julia Strupp<sup>1</sup>, for CoRe-Net**

<sup>1</sup>University of Cologne, Faculty of Medicine and University Hospital, Department of Palliative Medicine, Germany

<sup>2</sup>University of Cologne, Faculty of Medicine and University Hospital, Center for Integrated Oncology Aachen Bonn Cologne Dusseldorf (CIO ABCD), Germany

<sup>3</sup>University of Cologne, Faculty of Medicine and University Hospital, Clinical Trials Center (ZKS), Germany

<sup>4</sup>University of Cologne, Faculty of Medicine and University Hospital, Center for Health Services Research, Germany

<sup>5</sup>University of Cologne, Faculty of Human Sciences and Faculty of Medicine, Institute for Medical Sociology, Health Services Research, and Rehabilitation Science (IMVR), Germany

<sup>6</sup>University of Cologne, Faculty of Medicine and University Hospital, Institute of Medical Statistics and Computational Biology, Germany

<sup>7</sup>Lancaster University, Faculty of Health and Medicine, Division of Health Research, United Kingdom

<sup>8</sup>University of Education Heidelberg, Faculty of Educational and Social Sciences, Department of Educational Science, Germany

\* RV and GD contributed equally to this paper.

### Corresponding author:

Gloria Dust, University of Cologne, Faculty of Medicine and University Hospital, Department of Palliative Medicine, 50924 Cologne, Germany, gloria.dust@uk-koeln.de, +4922147887820

*I, the Submitting Author has the right to grant and does grant on behalf of all authors of the Work (as defined in the below author licence), an exclusive licence and/or a non-exclusive licence for contributions from authors who are: i) UK Crown employees; ii) where BMJ has agreed a CC-BY licence shall apply, and/or iii) in accordance with the terms applicable for US Federal Government officers or employees acting as part of their official duties; on a worldwide, perpetual, irrevocable, royalty-free basis to BMJ Publishing Group Ltd ("BMJ") its licensees and where the relevant Journal is co-owned by BMJ to the co-owners of the Journal, to publish the Work in BMJ Open and any other BMJ products and to exploit all rights, as set out in our licence.*

Words: 4185

1  
2  
3 **Abstract** (Words: 293)  
4

5 **Objectives** To set up a pragmatic double loop Plan-Do-Study-Act cycle by analysing patient  
6 experiences and determinants of satisfaction with care in the last year of life.  
7

8 **Design** Cross-sectional post-bereavement survey.  
9

10 **Setting** Regional health services research and development structure representing all health  
11 and social care providers involved in the last year of life in Cologne, a city with one million  
12 inhabitants in Germany.  
13  
14

15 **Participants** 351 bereaved relatives of adult decedents, representative for age and gender,  
16 accidental and suspicious deaths excluded.  
17  
18

19 **Results** For the majority (89%) of patients, home was the main place of care during their last  
20 year of life. Nevertheless, 91% of patients had at least one hospital admission and 42% died  
21 in hospital. Only 60% of informants reported that the decedent had been told that the disease  
22 was leading to death. Hospital physicians broke the news most often (58%), with their  
23 communication style often (30%) being rated as “not sensitive”. Informants indicated highly  
24 positive experiences with care provided by hospices (89% “good”) and specialist palliative  
25 home care teams (87% “good”). This proportion dropped to 41% for acute care hospitals, this  
26 rating being determined by the feeling of not being treated with respect and dignity ( $p<0.001$ )  
27 and the impression that hospitals did not work well together with other services ( $p=0.002$ ).  
28  
29  
30  
31  
32  
33

34 **Conclusions** Following this first step of a Plan-Do-Study-Act cycle a regional priority for  
35 action is improvement of care in acute hospitals, with two interventions starting currently,  
36 both how to recognise and communicate a limited life span, as well as improving care during  
37 the dying phase. All tools are now in place for a complete and functioning regional learning  
38 system. With the next steps of the continuous cycle the impact of system improvements will  
39 become measurable.  
40  
41  
42  
43

44 **Trial registration** German Clinical Trials Register: DRKS00011925.  
45  
46  
47

48 **Keywords:** PDSA cycle, last year of life, satisfaction, hospital care, VOICES questionnaire  
49  
50  
51  
52  
53  
54  
55  
56  
57  
58  
59  
60

### Strengths and limitations of this study

- This study presents a multidimensional and comprehensive assessment of care provided in multiple settings in the entire last year of life.
- It describes a pragmatic template for determining regional improvement priorities based on patient experiences using a city-wide health services research and development structure (Plan-Do-Study-Act cycle).
- The reports of relatives cannot be seen as a direct substitute for a self-assessment of patients, although a good agreement has been shown on service evaluations and observable symptoms.
- The retrospective approach bypasses the difficult task of identifying the terminally ill, avoids putting an additional burden on very sick participants, and minimises missing data due to poor functional status.

### INTRODUCTION

Patients in their last year of life may be regarded as vulnerable because most of them need complex care provided by multiple health and social care practitioners.[1] Their needs are often not sufficiently met, especially in settings outside specialist palliative and hospice care.[2, 3] Care transitions as well as non-beneficial treatments are common, which may compromise human dignity and quality end-of-life care.[4, 5] Evidence shows that most people prefer their home as place of death.[6] However, the majority of patients still die in acute care hospitals.[7] Fragmentation of multidisciplinary service provision is one major barrier to adequately addressing patients' needs and preferences.[8] Data on patients' and their families' perceptions are essential in order to understand these issues and to inform quality improvements. The last year of life can obviously only be objectively determined in retrospect, but it has to be managed prospectively. Adding palliative care in the last 12 to 24 months of life has proven to be greatly beneficial.[9, 10] Therefore, consideration also needs to be given to the introduction of these services.[11] However, the majority of surveys focuses on the dying phase or the last weeks to months of life and only a few studies have compared end-of-life care across different settings.[11-14] Care in the last year of life encompasses a wide range of services necessitating a multidimensional and comprehensive assessment approach.[12] This comprises the measurement of patients' experiences of the communication of a life-limiting disease ("transition into the last year of life"), transitions between health care settings ("transitions within the last year of life"), and the dying phase ("transition into death and a new phase of life for bereaved relatives"). For Germany, data on patients' perceptions of their experience of care in the last year of life that go beyond diagnoses and care settings are still rare.

1  
2  
3 Germany possesses a well-defined, government-led strategy for the development and  
4 promotion of national palliative care and performed well in the 2015 Quality of Death Index  
5 (position seven in the global rank of overall scores).[15] Based on the patients' needs, they  
6 may receive generalist palliative care (e.g. provided in a general hospital ward, a nursing  
7 home, by a general practitioner (GP) or a nursing service at home) or specialist palliative  
8 care provided by specialist personnel with expert knowledge, skills and attitudes (e.g.  
9 delivered in a hospital palliative care unit, a hospice or by a specialist palliative home care  
10 team).[16] Hospice care in Germany refers to care provided in an in-patient facility. In  
11 addition, hospice services delivered by volunteers may support the patients and their families  
12 during illness and after a patient's death. All services and accommodations in these facilities  
13 are provided at no extra cost to the patient and are part of the service of the statutory as well  
14 as private health insurance. As in many other countries, the national level indicates the  
15 general direction in which the health care system is developing. However, for the patients  
16 and relatives, the regional health care situation matters most, and this shows a lot of  
17 heterogeneity in Germany.[17] Due to this regional heterogeneity, this local level should be  
18 the driving force for innovation.[18, 19]

19  
20 Delivering improvements in the quality of healthcare remains an international challenge.  
21 Methods such as the Plan-Do-Study-Act (PDSA) cycle have been widely used in healthcare  
22 as an attempt to drive such improvements. The PDSA method is an iterative four-step cycle,  
23 which includes (1) identifying a change aimed at improvement, (2) testing this change, (3)  
24 examining the success of the change, and (4) identifying adaptations and next steps to  
25 inform a new cycle.[20] The fundamental principle is iteration.[21] By repeating the cycle  
26 (single-loop), it should be complemented by a second loop (double-loop) that facilitates  
27 assessment and – if necessary – replacement of the original paradigm of change and  
28 improvement (figure 1).[22, 23] Furthermore, in order to assess the effectiveness of changes,  
29 health services research is increasingly relying on pragmatic yet evidence-based  
30 methods.[24] This includes lower levels of evidence than explanatory trials as randomised  
31 controlled trials (RCT) tend to be very time- and resource-intensive. If we want to install a  
32 learning regional healthcare system, we need a compromise between RCTs and non-  
33 scientific practice. Thus, one practical solution is to establish a PDSA cycle and to use it as a  
34 Before-and-after-design without a control group (evidence level IIb).[25] Additionally, we can  
35 use observational methods to gain further knowledge on the evidence level III. To inform  
36 practice we need practical, but still evidence-based solutions which lead to satisficing  
37 decisions.[26-29] Therefore, as a paradigm case for a one million inhabitant urban health  
38 care situation, this paper describes the set-up of a pragmatic quality improvement structure  
39 to improve regional care. In particular, as the first step of the PDSA cycle we analyse patient  
40  
41  
42  
43  
44  
45  
46  
47  
48  
49  
50  
51  
52  
53  
54  
55  
56  
57  
58  
59  
60

1  
2  
3 experiences across settings and providers and determinants of satisfaction with care in the  
4 last year of life as reported by bereaved relatives.  
5  
6

7  
8 *(Please insert here: Figure 1: Strategic learning process framed on the double-loop*  
9 *PDSA cycle)*  
10

## 11 12 13 14 **METHODS**

### 15 **Setting up the regional structure**

16  
17 Initiated by three cooperating faculties (Human Sciences; Medicine; Management,  
18 Economics, and Social Sciences) of the University of Cologne, Germany, a regional health  
19 services research and development structure has been established involving as many  
20 relevant partners as possible from medical and social care as well as from health services  
21 research. The “Cologne Research and Development Network” (CoRe-Net)[30] focuses on  
22 the further development of health and social care according to the concept of learning  
23 organisations based on a bottom-up approach. Its main aim is to analyse and continuously  
24 improve healthcare delivery for vulnerable patient groups by going through PDSA cycles. We  
25 invited national and international scientific experts, regional health and social care  
26 institutions, patient organisations, and statutory health insurance providers to act as  
27 CoRe-Net collaboration partners. Within the network three research projects have been  
28 initiated, one focusing on patients in their last year of life. For this project entitled “Last Year  
29 of Life Study Cologne (LYOL-C)”[31] all relevant health and social care practitioners involved  
30 in the care of patients in their last year of life in Cologne were contacted for collaboration.  
31  
32  
33  
34  
35  
36  
37  
38  
39  
40

### 41 **Patient involvement**

42 Patient representatives were involved in the design and conduct of this research. They  
43 worked with us to refine the research question, choice of outcome measures, and methods of  
44 recruitment. In collaboration with patient representatives we will design a leaflet for  
45 dissemination to distributing to patient groups.  
46  
47  
48  
49

### 50 **Sample and data collection**

51 Data were collected in a post-bereavement survey as part of the project LYOL-C.  
52 Participants were a purposive sample of relatives, friends and voluntary workers (all will be  
53 referred to as “informants” hereafter). Inclusion criteria required informants to be aged 18  
54 years and older and to have recently cared for a person who lived their last year of life in the  
55 Cologne area. Deaths of people under the age of 18 as well as accidental and suspicious  
56 deaths were excluded. To ensure maximum variation, informants in this study were recruited  
57  
58  
59  
60



1  
2  
3 in cooperation with health and social care practitioners from Cologne (partners from care  
4 homes, nursing services, hospices, bereavement cafés, doctors, hospitals, undertakers, local  
5 public health department). We applied two strategies between November 2017 and August  
6 2018 to identify potential informants: i) Questionnaire distribution through cooperating care  
7 practitioners through client records by mail or personally. ii) Self-selection through public  
8 media (newspaper articles, flyers and posters): Informants who were interested in taking part  
9 in the survey could request a postal questionnaire from one of the researchers (GD); one  
10 reminder was sent. An information sheet describing the study's goals and a response form  
11 for opting out of the study were sent with the questionnaire. Informants gave written informed  
12 consent before taking part in the survey. All pseudonymously completed questionnaires were  
13 returned directly to the research team.  
14  
15  
16  
17  
18  
19  
20  
21

## 22 Questionnaire

23 The self-complete questionnaire is based on the Views Of Informal Carers – Evaluation of  
24 Services-Short Form (VOICES-SF).[32] It is a validated questionnaire to assess the  
25 bereaved relatives' perceptions of the patient's care experiences with providers and services  
26 across care settings in the last three months of life. VOICES-SF was developed for a  
27 nationally representative cross-sectional survey to examine the quality of end-of-life care in  
28 England, conducted annually for five years (2011-2015),[33] and has already been used  
29 internationally.[3, 34-40]  
30  
31  
32  
33

34 We developed an adapted German version ("VOICES-LYOL-Cologne") that covers the last  
35 twelve months of life and additionally includes the communication of the diagnosis of a life-  
36 limiting disease as well as places of care with periods of stay. The questionnaire comprises  
37 106 items and contains skip logic so that informants only respond to questions relevant to the  
38 care the patient received. For each specified setting/health care provider (home: nursing  
39 service, specialist palliative home care team, hospice service, GP, outpatient specialist  
40 physicians; care home; hospital (last admission), in-patient hospice), informants could rate  
41 their experiences with care on a 4-point scale with respect to the manner of communication,  
42 relief of pain, relief of other symptoms, coordination of care, care quality in the last two days  
43 of life (1=yes, 2=rather yes, 3=rather no, 4=no), respect and dignity (1=always, 2=most of the  
44 time, 3=some of the time, 4=never), and overall satisfaction (1=good, 2=rather good,  
45 3=rather bad, 4=bad). The questionnaire further assesses places of care with periods of stay;  
46 communication of a life-limiting disease; carer support, unmet needs, financial needs,  
47 preferences and decision-making, place of death, bereavement support; disease-specific and  
48 socio-demographic data. Objectivity, reliability and validity (content validity as well as  
49 divergent and convergent construct validity) were taken into consideration. The VOICES-  
50  
51  
52  
53  
54  
55  
56  
57  
58  
59  
60

1  
2  
3 LYOL-Cologne survey has been shown to be useful to assess the quality of care in the last  
4 year of life. [Dust et al. in preparation]  
5  
6  
7

### 8 **Statistical analyses**

9 Data were analysed descriptively and results are presented as mean  $\pm$  standard deviation  
10 (SD) and count (percentage), respectively. Differences in informants' ratings of care were  
11 tested using Mann-Whitney-U test and Wilcoxon signed-rank test.  
12  
13

14 Secondly, we performed a logistic regression analysis to explore factors associated with  
15 overall satisfaction with care provided in general hospital wards and intensive care units  
16 (ICU). All variables were dichotomised as applied in previous VOICES studies.[37, 41-43]  
17 The dependent variable ("Overall, do you feel that the care he/she got from the doctors in the  
18 hospital on that admission was: good, rather good, rather bad, bad?") was merged into the  
19 most positive response to the question vs. all other responses. The independent variables  
20 comprised socio-demographic variables of the informants and the deceased patients and  
21 variables concerning service provision. First, univariable effect was tested. In a second step,  
22 all variables with  $p$ -value $\leq$ 0.05 were entered into a multivariable logistic regression model  
23 using a stepwise, forward selection procedure. Results are presented as odds ratios (OR),  
24 corresponding 95% confidence intervals (CI), and  $p$ -values.  
25  
26  
27  
28  
29  
30

31 Data were analysed using SPSS Statistics version 25 (IBM Corp., Armonk, NY, USA) and  
32 RStudio version 3.5.1 (RStudio Inc., Boston, MA, USA). Analyses were restricted to  
33 individuals with complete data on all variables required for a particular analysis. All presented  
34  $p$ -values are two-sided and considered significant if  $p$ <0.05.  
35  
36  
37  
38

## 39 **RESULTS**

### 40 **Regional structure: The "Cologne Research and Development Network"**

41 CoRe-Net has been established as a long-term and sustainable network, making Cologne a  
42 model region for the improvement of health and social care in Germany. Its members consist  
43 of three research projects which meet once a month and their collaboration partners which  
44 meet at least once a year. The interdisciplinary cooperation enables the integration of  
45 different perspectives and methods. The management structure is balanced with regard to  
46 participation and integration of different stakeholders. The network is run by an executive  
47 board, monitored by a steering board, operationally led by a coordinating unit, and supported  
48 by an international advisory board.  
49  
50  
51  
52  
53

54 Around 100 partners from health and social care services in Cologne collaborated in the  
55 subproject LYOL-C. They represented care homes, nursing services, hospices, bereavement  
56 cafés, doctors, hospitals, undertakers and the local public health department. An initial  
57 meeting took place to consent the primary outcome and to discuss practical issues (e.g.  
58 recruitment).  
59  
60

## Survey sample

The questionnaire was returned by 365 informants. Response rate was 21.1% for postal distribution, 10.3% for personal distribution, and 74.9% for the self-selection group. A total of 14 questionnaires did not meet the inclusion criteria and had to be excluded. Characteristics of the patients and their informants are presented in table 1. For the 351 deceased patients, the majority of informants were a spouse or a child (81.8%), female (71.5%), and aged between 50 and 79 years (77.5%). Point in time of participation in the survey was  $7.6 \pm 4.9$  months after the patient's death. The sample of decedents comprises patients who died between December 2015 and July 2018. It was representative with respect to gender (47.9% male) and age ( $76.5 \pm 13.0$  years) compared with full data from the City of Cologne (gender: 50% male[44], age: 77.7 years[45]). The main underlying diseases were cancer (59.5%) and cardiovascular (40.5%), neuro-psychological (32.8%) and pulmonary (29.3%) diseases. One-third lived alone.

**Table 1: Demographics and characteristics of deceased patients and informants (N=351)**

|                                                 | <i>n</i> | (%)    |
|-------------------------------------------------|----------|--------|
| Deceased age at death (years)                   |          |        |
| 18-29                                           | 1        | (0.3)  |
| 30-49                                           | 6        | (1.7)  |
| 50-64                                           | 65       | (18.5) |
| 65-79                                           | 112      | (31.9) |
| 80+                                             | 167      | (47.6) |
| Deceased sex                                    |          |        |
| Male                                            | 168      | (47.9) |
| Female                                          | 183      | (52.1) |
| Deceased ethnic group                           |          |        |
| German                                          | 340      | (96.9) |
| Other                                           | 11       | (3.1)  |
| Deceased family situation <sup>a</sup>          |          |        |
| Had a partner                                   | 163      | (46.4) |
| Lived together with partner                     | 126      | (35.9) |
| Had children                                    | 168      | (47.9) |
| Lived together with children                    | 32       | (9.1)  |
| Lived together with someone else                | 21       | (6)    |
| Lived alone                                     | 114      | (32.5) |
| Someone else had a power of attorney            |          |        |
| Yes                                             | 311      | (88.6) |
| No                                              | 33       | (9.4)  |
| Do not know                                     | 7        | (2)    |
| Illnesses in the last year of life <sup>a</sup> |          |        |
| Cancer                                          | 209      | (59.5) |

1  
2  
3  
4  
5  
6  
7  
8  
9  
10  
11  
12  
13  
14  
15  
16  
17  
18  
19  
20  
21  
22  
23  
24  
25  
26  
27  
28  
29  
30  
31  
32  
33  
34  
35  
36  
37  
38  
39  
40  
41  
42  
43  
44  
45  
46  
47  
48  
49  
50  
51  
52  
53  
54  
55  
56  
57  
58  
59  
60

|                                   |     |        |
|-----------------------------------|-----|--------|
| Cardiovascular disease            | 142 | (40.5) |
| Neuro-psychological disease       | 115 | (32.8) |
| Disease of the respiratory system | 103 | (29.3) |
| Liver or kidney disease           | 67  | (19.1) |
| Diabetes mellitus                 | 45  | (12.8) |
| Decubitus ulcer                   | 24  | (6.8)  |
| Informant relation to deceased    |     |        |
| Spouse                            | 149 | (42.5) |
| Son/daughter                      | 138 | (39.3) |
| Sibling                           | 18  | (5.1)  |
| Son/daughter-in-law               | 9   | (2.6)  |
| Other relative                    | 17  | (4.8)  |
| Friend                            | 12  | (3.4)  |
| Other                             | 8   | (2.3)  |
| Informant age (years)             |     |        |
| 18-29                             | 2   | (0.6)  |
| 30-49                             | 46  | (13.1) |
| 50-64                             | 154 | (43.9) |
| 65-79                             | 118 | (33.6) |
| 80+                               | 31  | (8.8)  |
| Informant Sex                     |     |        |
| Male                              | 100 | (28.5) |
| Female                            | 251 | (71.5) |

<sup>a</sup> Multiple responses were possible.

### Transition into the last year of life

Two hundred and two (59.9%) of the informants reported that the patient had been told that the disease was leading to death. One-third (n=114, 33.8%) indicated that they had not been told and 21 (6.2%) did not know. Of those who were told, 44 (22.8%) received this information less than a month before death, but one-third (n=63, 32.6%) more than a year before death. Hospital doctors were mentioned as breaking the news most often (n=112, 58%), followed by outpatient specialist physicians (n=29, 15%), close relatives (n=22, 11.4%), GPs (n=15, 7.8%), staff of the specialist palliative home care team (n=6, 3.1%), staff in the care home (n=1, 0.5%) and staff in a hospice (n=1, 0.5%). Seven (3.6%) informants could not name the person who communicated the information.

### Transitions within the last year of life

Regarding the last year of life, most informants (n=310, 88.3%) reported that the deceased person spent some time at home and 75 (21.4%) some time in a care home. GPs (n=305, 86.9%) and outpatient specialist physicians (n=270, 76.9%) mainly provided outpatient care. Furthermore, 157 (44.7%) received care from a home nursing service, 135 (38.5%) from a specialist palliative home care team, and 23 (6.6%) were visited by a hospice service. For

1  
2  
3 224 (63.8%) patients the informant reported that urgent care provided out-of-hours was  
4 needed. Furthermore, a total of 320 (91.2%) patients stayed in hospital at least once and  
5 almost one-fifth (n=64, 18.2%) in a hospice.

6  
7  
8 On average, patients had  $3.72 \pm 3.1$  transitions between care settings in the last year of life.  
9 Each of the five most frequent transitions included hospital care: home to hospital (47.2%),  
10 hospital to home (27.3%), care home to hospital (6.4%), hospital to hospital (6.4%), and  
11 hospital to care home (4.1%) (n=255). There was an increasing shift from home to the  
12 hospital as the main place of care near death. While 12 months prior to death patients spent  
13 85.1% of their time at home and only 3.1% in hospital, in the final month of life they spent  
14 46.3% of time at home and 30.2% in hospital (figure 2).  
15  
16  
17  
18

19  
20 *(Please insert here: Figure 2: Care settings in the last year of life in Cologne (N=255))*  
21  
22

### 23 **Transition into death**

24  
25 42.2% (n=148) died in hospital, as opposed to only 4.2% (n=8) who wished to die there. 161  
26 relatives reported that the decedent did not express a preference for place of death or that  
27 they did not know the preference. The most preferred place of death was home (n=129,  
28 67.9%), and this wish was only fulfilled for 27.6% (n=97) of patients. Nevertheless, the  
29 majority of informants stated that the decedent died in the right place (n=294, 87.2%),  
30 although one-third reported that the patient did not have enough choice about where they  
31 died (n=94, 32.1%).  
32  
33  
34  
35  
36

### 37 **Perceived quality of and satisfaction with care in the last year of life**

38  
39 Regarding informants' views of professionals' way of communicating a life-limiting disease,  
40 they were least satisfied with hospital doctors (table 2). Almost one-third stated that the  
41 hospital doctor did not communicate in a sensitive and caring way. Differences between  
42 ratings of the hospital doctor and non-hospital health care providers were statistically  
43 significant (p=0.003, n=156).  
44  
45

46  
47 As examples of important quality indicators for care in the last year of life, table 2 further  
48 presents informants' ratings of perceived relief of pain and relief of other symptoms, as well  
49 as perceived coordination of care differentiated between care settings. It is notable that for  
50 symptom control both the home as well as acute hospital setting is rated the most poorly.  
51 Only 45.5% of informants stated that pain relief was good at home and 43.6% during the last  
52 stay in a general hospital ward or ICU. Proportions were even lower for other symptoms with  
53 good relief at home reported by 31.8% and 32.2% in a general hospital ward or ICU. For  
54 perceived coordination of care the general hospital wards and ICUs rank worst by far with  
55 only one-quarter of informants (25.6%) who said that the hospital worked well together with  
56  
57  
58  
59  
60

other services outside of the hospital. Hospice care was best rated for all three aspects. 80% of informants reported good pain relief, 67.2% good relief of other symptoms, and 90% good coordination of care.

**Table 2: Informants' views of professionals' communication style, relief of pain, relief of other symptoms, and coordination of care between care settings in the last year of life**

| Care setting                                                                | Overall rating |              |                     |                    |             |
|-----------------------------------------------------------------------------|----------------|--------------|---------------------|--------------------|-------------|
|                                                                             | N              | Yes<br>n (%) | Rather Yes<br>n (%) | Rather No<br>n (%) | No<br>n (%) |
| <b>Communication of life-limiting disease in a sensitive and caring way</b> |                |              |                     |                    |             |
| Hospice staff                                                               | 1              | 0 (0)        | 1 (100)             | 0 (0)              | 0 (0)       |
| Specialist palliative home care team                                        | 5              | 2 (40)       | 2 (40)              | 1 (20)             | 0 (0)       |
| Care home staff                                                             | 1              | 1 (100)      | 0 (0)               | 0 (0)              | 0 (0)       |
| General practitioner                                                        | 14             | 8 (57.1)     | 6 (42.9)            | 0 (0)              | 0 (0)       |
| Outpatient specialist                                                       | 25             | 9 (36)       | 11 (44)             | 4 (16)             | 1 (4)       |
| Relative                                                                    | 19             | 16 (84.2)    | 3 (15.8)            | 0 (0)              | 0 (0)       |
| Hospital doctor                                                             | 91             | 34 (37.4)    | 30 (33)             | 13 (14.3)          | 14 (15.4)   |
| <b>Relief of pain</b>                                                       |                |              |                     |                    |             |
| Hospice                                                                     | 60             | 48 (80)      | 10 (16.7)           | 2 (3.3)            | 0 (0)       |
| Hospital: Palliative care unit                                              | 84             | 51 (60.7)    | 23 (27.4)           | 7 (8.3)            | 3 (3.6)     |
| Care home                                                                   | 66             | 33 (50)      | 26 (39.4)           | 7 (10.6)           | 0 (0)       |
| Homecare                                                                    | 246            | 112 (45.5)   | 91 (37)             | 33 (13.4)          | 10 (4.1)    |
| Hospital: General ward/ICU                                                  | 188            | 82 (43.6)    | 78 (41.5)           | 21 (11.2)          | 7 (3.7)     |
| <b>Relief of other symptoms</b>                                             |                |              |                     |                    |             |
| Hospice                                                                     | 58             | 39 (67.2)    | 15 (25.9)           | 3 (5.2)            | 1 (1.7)     |
| Hospital: Palliative care unit                                              | 84             | 39 (46.4)    | 31 (36.9)           | 9 (10.7)           | 5 (6)       |
| Care home                                                                   | 60             | 28 (46.7)    | 24 (40)             | 8 (13.3)           | 0 (0)       |
| Homecare                                                                    | 255            | 81 (31.8)    | 113 (44.3)          | 41 (16.1)          | 20 (7.8)    |
| Hospital: General ward/ICU                                                  | 180            | 58 (32.2)    | 82 (45.6)           | 31 (17.2)          | 9 (5)       |
| <b>Worked well together with other services</b>                             |                |              |                     |                    |             |
| Hospice                                                                     | 50             | 45 (90)      | 3 (6)               | 0 (0)              | 2 (4)       |
| Hospital: Palliative care unit                                              | 54             | 35 (64.8)    | 12 (22.2)           | 4 (7.4)            | 3 (5.6)     |
| Care home                                                                   | 68             | 43 (63.2)    | 18 (26.5)           | 4 (5.9)            | 3 (4.4)     |
| Homecare                                                                    | 244            | 125 (51.2)   | 72 (29.5)           | 34 (13.9)          | 13 (5.3)    |
| Hospital: General ward/ICU                                                  | 133            | 34 (25.6)    | 24 (18)             | 32 (24.1)          | 43 (32.3)   |

ICU: Intensive care unit.

Accordingly, informants' perceived overall satisfaction with patient care over the whole last year of life varied significantly depending on the care setting (table 3). Informants were more likely to rate care provided by hospices (89.1%) and the specialist palliative home care team (86.8%) as "good". Lower proportions of good ratings were given for the hospital palliative

care units (68.5%), hospice services (68.4%), GPs (56.7%), care homes (50%), outpatient specialist physicians (47.6%), and nursing services (47.3%). They were least satisfied with the care provided in hospital general wards and ICUs, which was rated “good” by 41.3% and received the most “bad” (9.6%) ratings. Differences in informants’ reports of satisfaction with care in hospital general wards and ICUs were statistically significant in comparison to care provided by hospice ( $p=0.003$ ,  $n=41$ ), specialist palliative home care team ( $p<0.001$ ,  $n=76$ ), palliative care unit ( $p<0.001$ ,  $n=297$ ), home hospice service ( $p=0.033$ ,  $n=12$ ), and the GP ( $p=0.009$ ,  $n=179$ ).

**Table 3: Informants’ overall satisfaction with care provided by health and social care practitioners in the last year of life and comparison with the last hospital stay in a general ward or ICU**

| Care setting                            | Overall satisfaction with care |               |                      |                     |              | Hospital general ward/ICU vs. other setting <sup>a</sup> |                      |
|-----------------------------------------|--------------------------------|---------------|----------------------|---------------------|--------------|----------------------------------------------------------|----------------------|
|                                         | N                              | Good<br>n (%) | Rather good<br>n (%) | Rather bad<br>n (%) | Bad<br>n (%) | N                                                        | p-value              |
| Hospice                                 | 64                             | 57 (89.1)     | 5 (7.8)              | 0 (0)               | 2 (3.1)      | 41                                                       | 0.003 <sup>b</sup>   |
| Specialist palliative home care team    | 129                            | 112 (86.8)    | 13 (10.1)            | 2 (1.6)             | 2 (1.6)      | 76                                                       | < 0.001 <sup>b</sup> |
| Hospital (doctor): Palliative care unit | 89                             | 61 (68.5)     | 22 (24.7)            | 3 (3.4)             | 3 (3.4)      | 297                                                      | < 0.001 <sup>c</sup> |
| Hospice service                         | 19                             | 13 (68.4)     | 6 (31.6)             | 0 (0)               | 0 (0)        | 12                                                       | 0.033 <sup>b</sup>   |
| General practitioner                    | 282                            | 160 (56.7)    | 75 (26.6)            | 36 (12.8)           | 11 (3.9)     | 179                                                      | 0.009 <sup>b</sup>   |
| Care home                               | 72                             | 36 (50)       | 26 (36.1)            | 10 (13.9)           | 0 (0)        | 52                                                       | 0.068 <sup>b</sup>   |
| Outpatient specialists                  | 229                            | 109 (47.6)    | 76 (33.2)            | 30 (13.1)           | 14 (6.1)     | 135                                                      | 0.985 <sup>b</sup>   |
| Nursing service                         | 146                            | 69 (47.3)     | 59 (40.4)            | 15 (10.3)           | 3 (2.1)      | 101                                                      | 0.085 <sup>b</sup>   |
| Hospital (doctor): General ward/ICU     | 208                            | 86 (41.3)     | 76 (36.5)            | 26 (12.5)           | 20 (9.6)     | -                                                        | -                    |

<sup>a</sup> Compares informant’s overall rating of the last hospital stay (doctor) in a general ward or ICU with the overall rating of every other care setting for patients who experienced both forms of care (e.g. hospital general ward/ICU vs. hospice).

<sup>b</sup> Wilcoxon signed-rank test for paired samples.

<sup>c</sup> Mann-Whitney-U-Test.

ICU: Intensive care unit.

### Determinants of satisfaction with care in an acute hospital setting

Since care provided by general hospital wards and ICUs were rated worst compared to all other health and social care practitioners in the last year of life, we explored the determinants of satisfaction with care delivered in these hospital wards and units. Table 4 shows the

variables entered into the model and their frequencies of response to each of the questions by satisfaction of hospital care (satisfied/dissatisfied). It also presents the p-value relating to the univariate chi-squared test.

**Table 4: Univariate analyses of satisfaction with general hospital care during the last year of life**

|                                                                                                                                   | Satisfied with hospital care | Dissatisfied with hospital care | N   | p-value <sup>a</sup> |
|-----------------------------------------------------------------------------------------------------------------------------------|------------------------------|---------------------------------|-----|----------------------|
|                                                                                                                                   | n (%)                        | n (%)                           |     |                      |
| Age                                                                                                                               |                              |                                 |     |                      |
| < 85 years old                                                                                                                    | 62 (72.1)                    | 70 (57.4)                       | 208 | 0.043                |
| ≥ 85 years old                                                                                                                    | 24 (27.9)                    | 52 (42.6)                       |     |                      |
| Gender                                                                                                                            |                              |                                 |     |                      |
| Male                                                                                                                              | 50 (58.1)                    | 53 (43.4)                       | 208 | 0.052                |
| Female                                                                                                                            | 36 (41.9)                    | 69 (56.6)                       |     |                      |
| Family situation                                                                                                                  |                              |                                 |     |                      |
| Patient had a partner                                                                                                             | 47 (54.7)                    | 41 (33.6)                       | 208 | 0.037                |
| Other                                                                                                                             | 39 (45.3)                    | 81 (66.4)                       |     |                      |
| Did someone else have a power of attorney?                                                                                        |                              |                                 |     |                      |
| Yes                                                                                                                               | 72 (85.7)                    | 113 (94.2)                      | 204 | 0.072                |
| No                                                                                                                                | 12 (14.3)                    | 7 (5.8)                         |     |                      |
| Did he/she receive care by a specialist palliative home care team?                                                                |                              |                                 |     |                      |
| Yes                                                                                                                               | 39 (46.4)                    | 38 (31.4)                       | 205 | 0.042                |
| No                                                                                                                                | 45 (53.6)                    | 83 (68.6)                       |     |                      |
| During his/her last hospital admission, how much of the time was he/she treated with respect and dignity by the hospital doctors? |                              |                                 |     |                      |
| Always                                                                                                                            | 73 (90.1)                    | 25 (22.5)                       | 192 | < 0.001              |
| Most of the time/some of the time/never                                                                                           | 8 (9.9)                      | 86 (77.5)                       |     |                      |
| During his/her last hospital admission, was his/her pain relieved?                                                                |                              |                                 |     |                      |
| Yes                                                                                                                               | 53 (67.1)                    | 25 (25.3)                       | 178 | < 0.001              |
| Rather yes/rather no/no                                                                                                           | 26 (32.9)                    | 74 (74.7)                       |     |                      |
| During his/her last hospital admission, were other symptoms relieved?                                                             |                              |                                 |     |                      |
| Yes                                                                                                                               | 39 (51.3)                    | 16 (16.8)                       | 171 | < 0.001              |
| Rather yes/rather no/no                                                                                                           | 37 (48.7)                    | 79 (83.2)                       |     |                      |
| During his/her last hospital admission, did the hospital services work well together with other services outside of the hospital? |                              |                                 |     |                      |
| Yes                                                                                                                               | 30 (58.8)                    | 4 (5)                           | 131 | < 0.001              |
| Rather yes/rather no/no                                                                                                           | 21 (41.2)                    | 76 (95)                         |     |                      |

<sup>a</sup> Chi-square test.

As a result of the multivariable logistic regression analysis, two variables were found to predict satisfaction with hospital care while all other variables did not reach significance any



1  
2  
3 more. First, the model (n=124) indicated that the feeling that the patient was treated with  
4 respect and dignity by the doctor was associated with an almost 24-fold increase in the  
5 likelihood of being satisfied (OR=23.80, CI=7.503 to 75.498, p<0.001). Second, the  
6 impression that the hospital worked well together with other services outside the hospital was  
7 associated with an 8-fold increase of being satisfied (OR=8.37, CI=2.141 to 32.71, p=0.002).  
8 The adjusted R<sup>2</sup> was 0.478 (Cox & Snell), and 0.647 (Nagelkerkes).  
9  
10  
11  
12  
13

## 14 **DISCUSSION**

### 15 **Principal findings**

16 This study is the first to our knowledge to set up a pragmatic double loop PDSA cycle to  
17 improve regional care in the last year of life. Embedded in a regional health services  
18 research and development structure, we comprehensively analysed patient experiences with  
19 care in the last year of life from the bereaved relatives' perspectives. Hospitals were reported  
20 as the main player for diagnosing a progressive condition, for being involved in most  
21 transitions during the last year of life, and being the most frequent place of death despite all  
22 home palliative and hospice services available in Cologne. Yet, satisfaction was lowest with  
23 care provided in an acute hospital setting, which was determined by the feeling of not being  
24 treated with respect and dignity and the impression that hospitals did not work well together  
25 with other services. Based on this first step of the PDSA cycle, two interventions were  
26 developed to continue the cycle.  
27  
28  
29  
30  
31  
32  
33  
34  
35

### 36 **Strengths and weaknesses**

37 Most end-of-life care studies focus on a single care setting or are restricted to the dying  
38 phase, the last weeks of life or an underlying diagnosis. VOICES surveys include multiple  
39 settings to disaggregate findings according to specific setting type. Nevertheless, the  
40 instrument only evaluates the last three months of life.[32] Within this study, we utilised an  
41 adapted German version of the VOICES-SF, which was expanded to the last twelve months  
42 of life and included the communication of a life-limiting diagnosis. This instrument enables  
43 the reconstruction of the entire last year of life of patients, irrespective of the underlying  
44 diagnosis, to assess the provision and quality of care of all health and social care  
45 practitioners involved in patients' care. Our findings demonstrate the feasibility of collecting  
46 patient experiences reported by proxy-respondents across multiple care settings.  
47  
48  
49  
50  
51  
52  
53

54 In Germany there is no national register available that could be used to identify participants.  
55 Therefore, a population-based survey was not feasible and the sample of decedents  
56 represented in this study was a purposive sample. Due to the recruitment strategy, patients  
57 from palliative care services are overrepresented. Nevertheless, it appropriately reflected the  
58 age and gender distribution of people dying in the City of Cologne.[44, 45]  
59  
60

1  
2  
3 We used a retrospective research design and asked bereaved relatives to act as proxies for  
4 the deceased patients. Relatives' reports of care experiences after the death of a loved one  
5 are an important outcome measure to determine the quality of end-of-life care.[12] This  
6 method is, of course, not without its limitations, especially in relation to memory, the impact  
7 of bereaved relatives' feelings, and the concordance between patient and proxy reports.[46,  
8 47] A few studies examined these concerns and found that respondents were more accurate  
9 in recalling salient events and that satisfaction was mainly determined by service  
10 characteristics.[48, 49] A review on the validity of proxies' responses found that the level of  
11 agreement was good on service evaluations and observable symptoms, but lower for  
12 subjective symptoms such as pain.[50] The retrospective approach has a long history in the  
13 conducting of end-of-life-care research. It bypasses the difficult task of identifying the  
14 terminally ill, avoids putting an additional burden on very sick participants, and minimises  
15 missing data due to poor functional status. It furthermore creates a clear time frame for the  
16 purpose of comparing settings of care.[51]

### 27 **Comparison with existing literature**

28 We found substantial differences in the reported satisfaction with care depending on the care  
29 setting. Informants were significantly more satisfied with quality of care provided in hospices  
30 compared to other care settings. Unfortunately, only a small number of patients will ever be  
31 admitted to hospice. In Germany, approximately 5% of patients, most of them cancer  
32 patients, die in hospice.[52] Hospitals remain the most frequent place of death, with the  
33 highest levels of dissatisfaction. These results are similar to those from other VOICES  
34 studies carried out in Western countries.[1, 3, 35, 37] Previous studies also identified  
35 psychosocial rather than physical factors leading to dissatisfaction with care. A lack of  
36 personal care and dignity has been reported to cause patients to feel "devalued" or  
37 "dehumanised".[53] Being involved in decisions and discussing any worries were also  
38 described as predictors of satisfaction with hospital care.[41]

39 International studies have shown that there is still a discrepancy between current best  
40 practice recommendations and observed clinical reality; for example with regard to the  
41 recognition of a patient's transition into the last year of life, identifying a patient's palliative  
42 care needs, and aspects of shared decision making.[54] Reasons for this may lie in the  
43 obvious life-saving culture of hospitals where the norm is to prevent death by whatever  
44 means are necessary. Furthermore, it may also be due to the increasing time and cost  
45 pressure put on hospitals without these institutions having established standards for patients  
46 who will die within the foreseeable future.[55] Since almost 30% of all hospital patients are  
47 expected to be in their last year of life,[56] our findings stress the importance of a further  
48 integration of palliative care into acute care hospitals. Strategies for integrating palliative care  
49  
50  
51  
52  
53  
54  
55  
56  
57  
58  
59  
60

1  
2  
3 into a country's health care system have been developed. In 2007 the World Health  
4 Organization (WHO) published a public health strategy that includes advice and guidelines  
5 for governments on priorities and how to implement national palliative care programmes.[57]  
6 Furthermore, international experts in palliative care and cancer care formulated written  
7 statements regarding how integrated palliative care can be operationalised.[58]  
8  
9  
10

### 11 12 **Implications and future research**

13  
14 These data have already led to the next PDSA cycle step with direct consequences for  
15 regional action. We concluded by planning interventions in acute care hospitals in Cologne  
16 targeting both the beginning and the end of the last year of life. It was therefore decided (1)  
17 to target the identification of patients in their last year of life and the initiation of conversations  
18 about patient wishes by tailoring and testing the "Acute Hospital Programme" by the Gold  
19 Standards Framework and (2) to begin a process within hospital unit teams to discuss how to  
20 better reach quality indicators for care in the dying phase as described in the national  
21 guideline.[16, 59] With the next steps of this continuous cycle, we will "do" and "study" the  
22 effectiveness of the interventions described above. This study could serve as an example for  
23 determining regional improvement priorities based on patient experiences.  
24  
25  
26  
27  
28  
29  
30

### 31 **DECLARATIONS**

32  
33  
34 **Contributors:** RV and GD are joint first authors and act as guarantors. RV, JS and CR are  
35 principal investigators and responsible for the study design, project management, data  
36 analysis and dissemination. GD and NiS designed the survey instrument and collected data.  
37 GD cleaned and analysed data. SH, SP, NaS and HP contributed to study design, data  
38 analysis and dissemination. HP is principal investigator of CoRe-Net. NaS coordinates  
39 CoRe-Net. All authors read and approved the final manuscript.  
40  
41  
42  
43  
44  
45

46 **Ethics approval:** All procedures for this study were approved by the Ethics Commission of  
47 the Faculty of Medicine of the University of Cologne, Germany (#17-188). Participants gave  
48 written informed consent before taking part.  
49  
50  
51

52 **Funding:** This work was supported by the German Federal Ministry of Education and  
53 Research (BMBF), grant number #01GY1606.  
54  
55

56  
57 **Competing interests:** None declared.  
58  
59  
60

1  
2  
3 **Acknowledgements:** This study was made possible by the collaborative efforts of health  
4 and social care practitioners in Cologne. We further thank everyone who contributed their  
5 time and expertise, in particular the study participants, the CoRe-Net Co-applicants and our  
6 research assistant Christian von Reeken.  
7  
8  
9

10  
11 **Collaborators:** The CoRe-Net Co-applicants: Professor Dr Christian Albus, Department of  
12 Psychosomatics and Psychotherapy, Faculty of Medicine (FM), University Hospital Cologne  
13 (UHC); Professor Dr Lena Ansmann, Department of Health Services Research, School of  
14 Medicine and Health Sciences, Carl von Ossietzky University Oldenburg; Professor Dr Frank  
15 Jessen, Department of Psychiatry and Psychotherapy, FM, UHC; Professor Dr Ute Karbach,  
16 Sociology in Rehabilitation, Faculty of Rehabilitation, Technical University Dortmund;  
17 Professor Dr Ludwig Kuntz, Department of Business Administration and Health Care  
18 Management, Faculty of Management, Economics and Social Sciences (FMESS), University  
19 of Cologne (UoC); Dr Ingrid Schubert, PMV Health Care Research Group, FM, UoC;  
20 Professor Dr Frank Schulz-Nieswandt, Institute for Sociology and Social Psychology,  
21 FMESS, UoC; Professor Dr Stephanie Stock, Institute for Health Economics and Clinical  
22 Epidemiology, FM, UHC.  
23  
24  
25  
26  
27  
28  
29  
30

31 **Data sharing:** Data are available upon reasonable request from the corresponding author.  
32  
33  
34  
35  
36  
37  
38  
39  
40  
41  
42  
43  
44  
45  
46  
47  
48  
49  
50  
51  
52  
53  
54  
55  
56  
57  
58  
59  
60

## References

1. Hanratty B, Lawson E, Grande G, et al. Transitions at the end of life for older adults – patient, carer and professional perspectives: a mixed-methods study. Southampton, UK: NIHR Journals Library 2014:130.
2. Addington-Hall JM, O'Callaghan AC. A comparison of the quality of care provided to cancer patients in the UK in the last three months of life in in-patient hospices compared with hospitals, from the perspective of bereaved relatives: results from a survey using the VOICES questionnaire. *Palliat Med* 2009;23:190–7.
3. Bainbridge D, Seow H. Palliative Care Experience in the Last 3 Months of Life: A Quantitative Comparison of Care Provided in Residential Hospices, Hospitals, and the Home From the Perspectives of Bereaved Caregivers. *Am J Hosp Palliat Care* 2018;35:456–63.
4. Bone AE, Gao W, Gomes B, et al. Factors Associated with Transition from Community Settings to Hospital as Place of Death for Adults Aged 75 and Older: A Population-Based Mortality Follow-Back Survey. *J Am Geriatr Soc* 2016;64:2210–7.
5. Cardona-Morrell M, Kim JCH, Turner RM, et al. Non-beneficial treatments in hospital at the end of life: a systematic review on extent of the problem. *Int J Qual Health Care* 2016;28:456–69.
6. Gomes B, Calanzani N, Gysels M, et al. Heterogeneity and changes in preferences for dying at home: a systematic review. *BMC Palliat Care* 2013;12:7.
7. Bekelman JE, Halpern SD, Blankart CR, et al. Comparison of Site of Death, Health Care Utilization, and Hospital Expenditures for Patients Dying With Cancer in 7 Developed Countries. *JAMA* 2016;315:272–83.
8. Oishi A, Murtagh FEM. The challenges of uncertainty and interprofessional collaboration in palliative care for non-cancer patients in the community: a systematic review of views from patients, carers and health-care professionals. *Palliat Med* 2014;28:1081–98.
9. Temel JS, Greer JA, Muzikansky A, et al. Early Palliative Care for Patients with Metastatic Non–Small-Cell Lung Cancer. *N Engl J Med* 2010;363:733–42.
10. Smith TJ, Temin S, Alesi ER, et al. American Society of Clinical Oncology provisional clinical opinion: the integration of palliative care into standard oncology care. *J Clin Oncol* 2012;30:880–7.
11. Bainbridge D, Seow H. Measuring the Quality of Palliative Care at End of Life: An Overview of Data Sources. *Healthy Aging & Clinical Care in the Elderly* 2016;8:9–15.
12. Lendon JP, Ahluwalia SC, Walling AM, et al. Measuring Experience With End-of-Life Care: A Systematic Literature Review. *J Pain Symptom Manage* 2015;49:904-15.e1-3.
13. Mayland CR, Williams EMI, Ellershaw JE. How well do current instruments using bereaved relatives' views evaluate care for dying patients? *Palliat Med* 2008;22:133–44.
14. Kupeli N, Candy B, Tamura-Rose G, et al. Tools Measuring Quality of Death, Dying, and Care, Completed after Death: Systematic Review of Psychometric Properties. *Patient* 2019;12:183-97.
15. The Economist Intelligence Unit. The 2015 Quality of Death Index: Ranking palliative care across the world 2015. <https://eiperspectives.economist.com/sites/default/files/2015%20EIU%20Quality%20of%20Death%20Index%20Oct%2029%20FINAL.pdf> (accessed 5 Nov 2019).
16. German Cancer Society, German Cancer Aid, AWMF. Palliative care for patients with incurable cancer, short version 2.0: AWMF-registration number 128/001OL 2019. <https://www.leitlinienprogramm-onkologie.de/leitlinien/palliativmedizin/> (accessed 5 Nov 2019).

17. Bertelsmann Stiftung. Palliative care: Available services do not (yet) meet patient needs - Expansion requires clear regulatory strategy: Spotlight Healthcare. Gütersloh: Bertelsmann Stiftung 2015.
18. Braithwaite J. Changing how we think about healthcare improvement. *BMJ* 2018;361:k2014.
19. Hämel K, Ewers M, Schaeffer D. Health care and regional disparities: [Article in German]. *Z Gerontol Geriatr* 2013;46:323–8.
20. Taylor MJ, McNicholas C, Nicolay C, et al. Systematic review of the application of the plan-do-study-act method to improve quality in healthcare. *BMJ quality & safety* 2014;23:290–8.
21. Pietrzak M, Paliszkiwicz J. Framework of Strategic Learning: The PDCA Cycle. *Management* 2015;10:149–61.
22. Pfaff H, Zeike S. Controlling im Betrieblichen Gesundheitsmanagement: Das 7-Schritte-Modell. Wiesbaden: Gabler Verlag 2019.
23. Argyris C. Single-Loop and Double-Loop Models in Research on Decision Making. *Adm Sci Q* 1976;21:363.
24. Long KM, McDermott F, Meadows GN. Being pragmatic about healthcare complexity: our experiences applying complexity theory and pragmatism to health services research. *BMC Med* 2018;16:94.
25. Fitzgerald L, McDermott A. Challenging perspectives on organizational change in health care. New York: Routledge 2017:xiii, 203.
26. Parker AM, Bruine de Bruin W, Fischhoff B. Maximizers versus satisficers: Decision-making styles, competence, and outcomes. *Judgment and Decision making* 2007;2:342–50.
27. Schwartz B, Ben-Haim Y, Dacso C. What Makes a Good Decision? Robust Satisficing as a Normative Standard of Rational Decision Making. *J Theory Soc Behav* 2011;41:209–27.
28. Simon HA. Rational decision making in business organizations. *The American economic review* 1979;66:493–513.
29. Simon HA. Making Management Decisions: the Role of Intuition and Emotion. *Academy of Management Perspectives* 1987;1:57–64.
30. Karbach U, Ansmann L, Scholten N, et al. Report from an ongoing research project: The Cologne Research and Development Network (CoRe-Net) and the value-based approach to healthcare.: [Article in German]. *Z Evid Fortbild Qual Gesundheitswes* 2018;130:21–6.
31. Strupp J, Hanke G, Schippel N, et al. Last Year of Life Study Cologne (LYOL-C): protocol for a cross-sectional mixed methods study to examine care trajectories and transitions in the last year of life until death. *BMJ open* 2018;8:e021211.
32. Hunt KJ, Richardson A, Darlington A-SE, et al. Developing the methods and questionnaire (VOICES-SF) for a national retrospective mortality follow-back survey of palliative and end-of-life care in England. *BMJ Supportive & Palliative Care* 2017.
33. Office for National Statistics. National Survey of Bereaved People (VOICES): Information paper 2016:13.
34. Ross L, Neergaard MA, Petersen MA, et al. Measuring the quality of end-of-life care: Development, testing, and cultural validation of the Danish version of Views of Informal Carers' Evaluation of Services-Short Form. *Palliat Med* 2017;269216317740274.
35. Beccaro M, Caraceni A, Costantini M. End-of-life care in Italian hospitals: quality of and satisfaction with care from the caregivers' point of view--results from the Italian Survey of the Dying of Cancer. *J Pain Symptom Manage* 2010;39:1003–15.

- 1  
2  
3 36. Frey R, Williams L, Trussardi G, et al. The Views of Informal Carers' Evaluation of  
4 Services (VOICES): Toward an adaptation for the New Zealand bicultural context. *Palliat*  
5 *Support Care* 2017;15:67–76.  
6  
7 37. O'Sullivan A, Alvariza A, Öhlen J, et al. Bereaved Family Members' Satisfaction with  
8 Care during the Last Three Months of Life for People with Advanced Illness. *Healthcare*  
9 *(Basel)* 2018;6:E130.  
10  
11 38. Pungchompoo W, Suwan P, Kunapun S, et al. Experiences of symptoms and health  
12 service preferences among older people living with chronic diseases during the last year of  
13 life. *Int J Palliat Nurs* 2019;25:129–41.  
14  
15 39. Ingleton C, Morgan J, Hughes P, et al. Carer satisfaction with end-of-life care in  
16 Powys, Wales: a cross-sectional survey. *Health Soc Care Community* 2004;12:43–52.  
17  
18 40. Donnelly S, Prizeman G, Coimín DÓ, et al. Voices that matter: end-of-life care in two  
19 acute hospitals from the perspective of bereaved relatives. *BMC Palliat Care* 2018;17:117.  
20  
21 41. Young AJ, Rogers A, Dent L, et al. Experiences of hospital care reported by bereaved  
22 relatives of patients after a stroke: a retrospective survey using the VOICES questionnaire. *J*  
23 *Adv Nurs* 2009;65:2161–74.  
24  
25 42. Hunt KJ, Shlomo N, Addington-Hall J. End-of-life care and achieving preferences for  
26 place of death in England: results of a population-based survey using the VOICES-SF  
27 questionnaire. *Palliat Med* 2014;28:412–21.  
28  
29 43. Hunt KJ, Shlomo N, Addington-Hall J. End-of-life care and preferences for place of  
30 death among the oldest old: results of a population-based survey using VOICES-Short Form.  
31 *J Palliat Med* 2014;17:176–82.  
32  
33 44. Stadt Köln - Amt für Stadtentwicklung und Statistik. Kölner Statistische Nachrichten -  
34 1/2019: Statistisches Jahrbuch Köln 2018. Köln: Stadt Köln 2019.  
35  
36 45. Stadt Köln - Amt für Stadtentwicklung und Statistik. Kölner Zahlenspiegel. Köln: Stadt  
37 Köln 2018.  
38  
39 46. Baddeley AD. Human memory: Theory and practice. Boston, MA: Allyn and Bacon  
40 1990:515.  
41  
42 47. Bower GH. Mood and memory. *Am Psychol* 1981;36:129–48.  
43  
44 48. Fakhoury W, McCarthy M, Addington-Hall J. Determinants of informal caregivers'  
45 satisfaction with services for dying cancer patients. *Soc Sci Med* 1996;42:721–31.  
46  
47 49. Mathiowetz NA. Forgetting Events in autobiographical memory: Findings from a  
48 health care survey Rockville 1988.  
49 [http://www.asasrms.org/Proceedings/papers/1988\\_029.pdf](http://www.asasrms.org/Proceedings/papers/1988_029.pdf) (accessed 5 Nov 2019).  
50  
51 50. McPherson CJ, Addington-Hall JM. Judging the quality of care at the end of life: can  
52 proxies provide reliable information? *Soc Sci Med* 2003;56:95–109.  
53  
54 51. Teno JM. Measuring end-of-life care outcomes retrospectively. *J Palliat Med* 2005;8  
55 Suppl 1:S42-9.  
56  
57 52. Dasch B, Blum K, Gude P, et al. Place of Death: Trends Over the Course of a  
58 Decade: A Population-Based Study of Death Certificates From the Years 2001 and 2011.  
59 *Dtsch Arztebl Int* 2015;112:496–504.  
60  
61 53. Rogers A, Karlsen S, Addington-Hall J. 'All the services were excellent. It is when the  
62 human element comes in that things go wrong': dissatisfaction with hospital care in the last  
63 year of life. *J Adv Nurs* 2000;31:768–74.  
64  
65 54. Milnes S, Orford NR, Berkeley L, et al. A prospective observational study of  
66 prevalence and outcomes of patients with Gold Standard Framework criteria in a tertiary  
67 regional Australian Hospital. *BMJ Supportive & Palliative Care* 2019;9:92–9.

- 1  
2  
3 55. Gott M, Ingleton C, Bennett MI, et al. Transitions to palliative care in acute hospitals in  
4 England: qualitative study. *BMJ* 2011;342:d1773.  
5  
6 56. Clark D, Armstrong M, Allan A, et al. Imminence of death among hospital inpatients:  
7 Prevalent cohort study. *Palliat Med* 2014;28:474–9.  
8  
9 57. Stjernswärd J, Foley KM, Ferris FD. The public health strategy for palliative care. *J*  
10 *Pain Symptom Manage* 2007;33:486–93.  
11  
12 58. Payne S, Hughes S, Wilkinson J, et al. Recommendations on priorities for integrated  
13 palliative care: transparent expert consultation with international leaders for the InSuP-C  
14 project. *BMC Palliat Care* 2019;18:32.  
15  
16 59. The Gold Standards Framework. Acute Hospital Programme: Summary of Evidence  
17 of Effectiveness 2016. [http://www.goldstandardsframework.org.uk/cd-](http://www.goldstandardsframework.org.uk/cd-content/uploads/files/GSF%20Summary%20of%20Evaluation%20%20Acute%20Hospitals%20Sept%202016%281%29.pdf)  
18 [content/uploads/files/GSF%20Summary%20of%20Evaluation%20%20Acute%20Hospitals%](http://www.goldstandardsframework.org.uk/cd-content/uploads/files/GSF%20Summary%20of%20Evaluation%20%20Acute%20Hospitals%20Sept%202016%281%29.pdf)  
19 [20Sept%202016%281%29.pdf](http://www.goldstandardsframework.org.uk/cd-content/uploads/files/GSF%20Summary%20of%20Evaluation%20%20Acute%20Hospitals%20Sept%202016%281%29.pdf) (accessed 5 Nov 2019).  
20  
21  
22  
23  
24  
25  
26  
27  
28  
29  
30  
31  
32  
33  
34  
35  
36  
37  
38  
39  
40  
41  
42  
43  
44  
45  
46  
47  
48  
49  
50  
51  
52  
53  
54  
55  
56  
57  
58  
59  
60



1  
2  
3 **FIGURES**  
4

5 **Figure 1: Strategic learning process framed on the double-loop PDSA cycle**  
6

7 *(based on Pfaff and Zeike (2019))*  
8

9 **Figure 2: Care settings in the last year of life in Cologne (N=255)**  
10  
11  
12  
13  
14  
15  
16  
17  
18  
19  
20  
21  
22  
23  
24  
25  
26  
27  
28  
29  
30  
31  
32  
33  
34  
35  
36  
37  
38  
39  
40  
41  
42  
43  
44  
45  
46  
47  
48  
49  
50  
51  
52  
53  
54  
55  
56  
57  
58  
59  
60

For peer review only

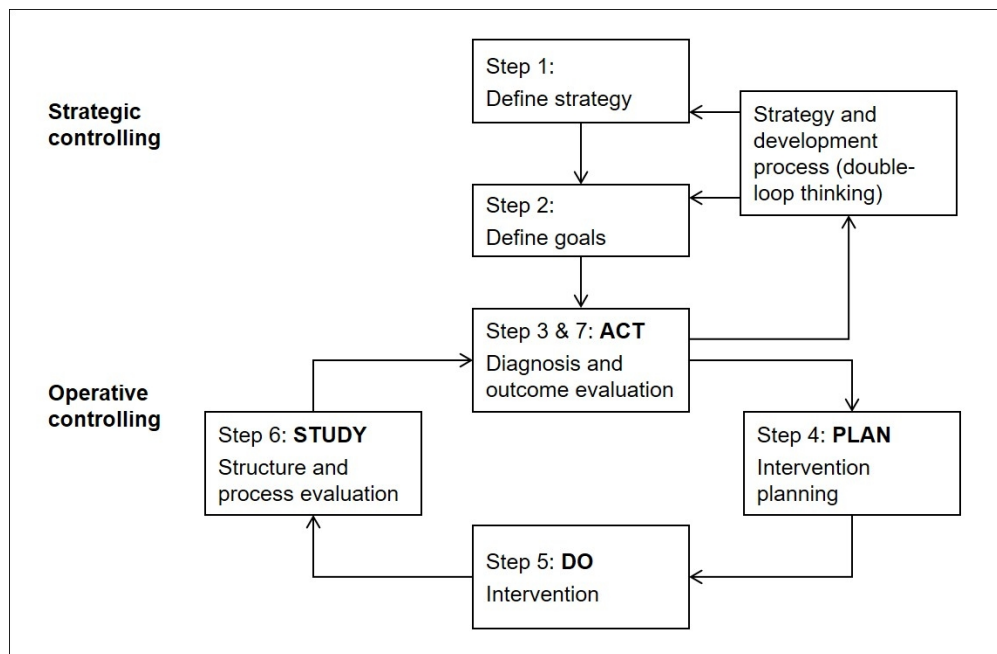

Figure 1: Strategic learning process framed on the double-loop PDSA cycle (based on Pfaff and Zeike (2019))

194x126mm (150 x 150 DPI)

1  
2  
3  
4  
5  
6  
7  
8  
9  
10  
11  
12  
13  
14  
15  
16  
17  
18  
19  
20  
21  
22  
23  
24  
25  
26  
27  
28  
29  
30  
31  
32  
33  
34  
35  
36  
37  
38  
39  
40  
41  
42  
43  
44  
45  
46  
47  
48  
49  
50  
51  
52  
53  
54  
55  
56  
57  
58  
59  
60

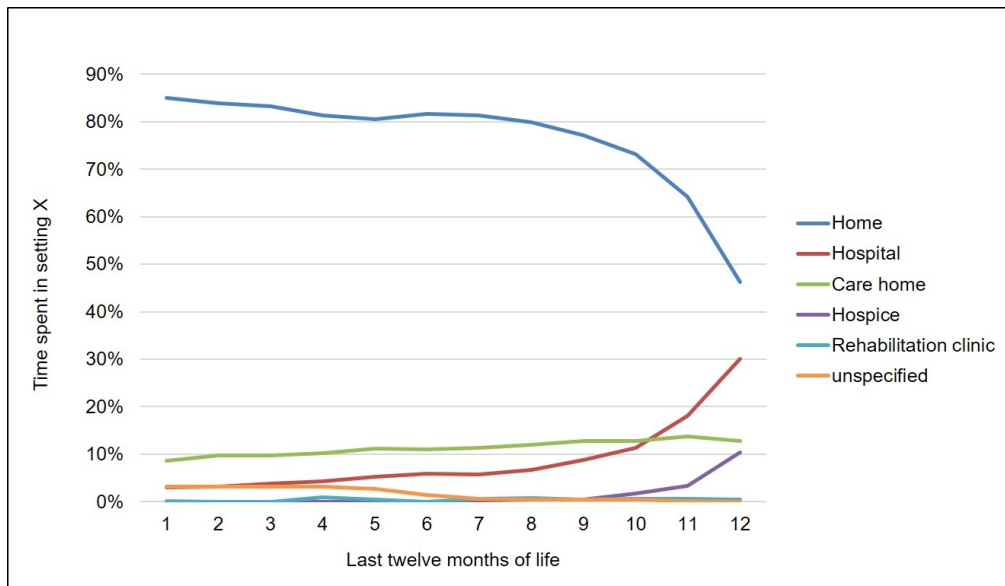

Figure 2: Care settings in the last year of life in Cologne (N=255)

222x130mm (150 x 150 DPI)

STROBE Statement—Checklist of items that should be included in reports of *cross-sectional studies*

|                              | Item No | Recommendation                                                                                                                                                                                               | Page No |
|------------------------------|---------|--------------------------------------------------------------------------------------------------------------------------------------------------------------------------------------------------------------|---------|
| <b>Title and abstract</b>    | 1       | (a) Indicate the study's design with a commonly used term in the title or the abstract                                                                                                                       | 1, 2    |
|                              |         | (b) Provide in the abstract an informative and balanced summary of what was done and what was found                                                                                                          | 2       |
| <b>Introduction</b>          |         |                                                                                                                                                                                                              |         |
| Background/rationale         | 2       | Explain the scientific background and rationale for the investigation being reported                                                                                                                         | 3, 4    |
| Objectives                   | 3       | State specific objectives, including any prespecified hypotheses                                                                                                                                             | 5       |
| <b>Methods</b>               |         |                                                                                                                                                                                                              |         |
| Study design                 | 4       | Present key elements of study design early in the paper                                                                                                                                                      | 5       |
| Setting                      | 5       | Describe the setting, locations, and relevant dates, including periods of recruitment, exposure, follow-up, and data collection                                                                              | 5,6     |
| Participants                 | 6       | (a) Give the eligibility criteria, and the sources and methods of selection of participants                                                                                                                  | 5       |
| Variables                    | 7       | Clearly define all outcomes, exposures, predictors, potential confounders, and effect modifiers. Give diagnostic criteria, if applicable                                                                     | 6       |
| Data sources/<br>measurement | 8*      | For each variable of interest, give sources of data and details of methods of assessment (measurement). Describe comparability of assessment methods if there is more than one group                         | 6       |
| Bias                         | 9       | Describe any efforts to address potential sources of bias                                                                                                                                                    | 6       |
| Study size                   | 10      | Explain how the study size was arrived at                                                                                                                                                                    | 5,6     |
| Quantitative variables       | 11      | Explain how quantitative variables were handled in the analyses. If applicable, describe which groupings were chosen and why                                                                                 | 7       |
| Statistical methods          | 12      | (a) Describe all statistical methods, including those used to control for confounding                                                                                                                        | 7       |
|                              |         | (b) Describe any methods used to examine subgroups and interactions                                                                                                                                          | 7       |
|                              |         | (c) Explain how missing data were addressed                                                                                                                                                                  | 7       |
|                              |         | (d) If applicable, describe analytical methods taking account of sampling strategy                                                                                                                           | /       |
|                              |         | (e) Describe any sensitivity analyses                                                                                                                                                                        | /       |
| <b>Results</b>               |         |                                                                                                                                                                                                              |         |
| Participants                 | 13*     | (a) Report numbers of individuals at each stage of study—eg numbers potentially eligible, examined for eligibility, confirmed eligible, included in the study, completing follow-up, and analysed            | 7,8     |
|                              |         | (b) Give reasons for non-participation at each stage                                                                                                                                                         | 7,8     |
|                              |         | (c) Consider use of a flow diagram                                                                                                                                                                           | /       |
| Descriptive data             | 14*     | (a) Give characteristics of study participants (eg demographic, clinical, social) and information on exposures and potential confounders                                                                     | 8,9     |
|                              |         | (b) Indicate number of participants with missing data for each variable of interest                                                                                                                          | 9-14    |
| Outcome data                 | 15*     | Report numbers of outcome events or summary measures                                                                                                                                                         | 9-14    |
| Main results                 | 16      | (a) Give unadjusted estimates and, if applicable, confounder-adjusted estimates and their precision (eg, 95% confidence interval). Make clear which confounders were adjusted for and why they were included | 12-14   |

|                          |    |                                                                                                                                                                            |       |
|--------------------------|----|----------------------------------------------------------------------------------------------------------------------------------------------------------------------------|-------|
|                          |    | (b) Report category boundaries when continuous variables were categorized                                                                                                  | /     |
|                          |    | (c) If relevant, consider translating estimates of relative risk into absolute risk for a meaningful time period                                                           | /     |
| Other analyses           | 17 | Report other analyses done—eg analyses of subgroups and interactions, and sensitivity analyses                                                                             | /     |
| <b>Discussion</b>        |    |                                                                                                                                                                            |       |
| Key results              | 18 | Summarise key results with reference to study objectives                                                                                                                   | 14    |
| Limitations              | 19 | Discuss limitations of the study, taking into account sources of potential bias or imprecision. Discuss both direction and magnitude of any potential bias                 | 14,15 |
| Interpretation           | 20 | Give a cautious overall interpretation of results considering objectives, limitations, multiplicity of analyses, results from similar studies, and other relevant evidence | 14,15 |
| Generalisability         | 21 | Discuss the generalisability (external validity) of the study results                                                                                                      | 14,15 |
| <b>Other information</b> |    |                                                                                                                                                                            |       |
| Funding                  | 22 | Give the source of funding and the role of the funders for the present study and, if applicable, for the original study on which the present article is based              | 16    |

\*Give information separately for exposed and unexposed groups.

**Note:** An Explanation and Elaboration article discusses each checklist item and gives methodological background and published examples of transparent reporting. The STROBE checklist is best used in conjunction with this article (freely available on the Web sites of PLoS Medicine at <http://www.plosmedicine.org/>, Annals of Internal Medicine at <http://www.annals.org/>, and Epidemiology at <http://www.epidem.com/>). Information on the STROBE Initiative is available at [www.strobe-statement.org](http://www.strobe-statement.org).

# BMJ Open

## Improving regional care in the last year of life by setting up a pragmatic evidence-based Plan-Do-Study-Act cycle: Results from a cross-sectional survey

|                                 |                                                                                                                                                                                                                                                                                                                                                                                                                                                                                                                                                                                                                                                                                                                                                                                                                                                                                                                                                                                                                                                                                                                                                                                                                                                                                                                                                              |
|---------------------------------|--------------------------------------------------------------------------------------------------------------------------------------------------------------------------------------------------------------------------------------------------------------------------------------------------------------------------------------------------------------------------------------------------------------------------------------------------------------------------------------------------------------------------------------------------------------------------------------------------------------------------------------------------------------------------------------------------------------------------------------------------------------------------------------------------------------------------------------------------------------------------------------------------------------------------------------------------------------------------------------------------------------------------------------------------------------------------------------------------------------------------------------------------------------------------------------------------------------------------------------------------------------------------------------------------------------------------------------------------------------|
| Journal:                        | <i>BMJ Open</i>                                                                                                                                                                                                                                                                                                                                                                                                                                                                                                                                                                                                                                                                                                                                                                                                                                                                                                                                                                                                                                                                                                                                                                                                                                                                                                                                              |
| Manuscript ID                   | bmjopen-2019-035988.R1                                                                                                                                                                                                                                                                                                                                                                                                                                                                                                                                                                                                                                                                                                                                                                                                                                                                                                                                                                                                                                                                                                                                                                                                                                                                                                                                       |
| Article Type:                   | Original research                                                                                                                                                                                                                                                                                                                                                                                                                                                                                                                                                                                                                                                                                                                                                                                                                                                                                                                                                                                                                                                                                                                                                                                                                                                                                                                                            |
| Date Submitted by the Author:   | 27-Aug-2020                                                                                                                                                                                                                                                                                                                                                                                                                                                                                                                                                                                                                                                                                                                                                                                                                                                                                                                                                                                                                                                                                                                                                                                                                                                                                                                                                  |
| Complete List of Authors:       | Voltz, Raymond; University of Cologne, Faculty of Medicine and University Hospital, Department of Palliative Medicine<br>Dust, Gloria; University of Cologne, Faculty of Medicine and University Hospital, Department of Palliative Medicine<br>Schippel, Nicolas; University of Cologne, Faculty of Human Sciences and Faculty of Medicine, Institute for Medical Sociology, Health Services Research, and Rehabilitation Science<br>Hamacher, Stefanie; University of Cologne, Faculty of Medicine and University Hospital, Institute of Medical Statistics and Computational Biology<br>Payne, Sheila; University of Lancaster, Lancaster University, Faculty of Health and Medicine, Division of Health Research<br>Scholten, Nadine; University of Cologne, Faculty of Human Sciences and Faculty of Medicine, Institute for Medical Sociology, Health Services Research, and Rehabilitation Science<br>Pfaff, Holger; University of Cologne, Faculty of Human Sciences and Faculty of Medicine, Institute for Medical Sociology, Health Services Research, and Rehabilitation Science<br>Rietz, Christian; Heidelberg University of Education, , Faculty of Educational and Social Sciences, Department of Educational Science<br>Strupp, Julia; University of Cologne, Faculty of Medicine and University Hospital, Department of Palliative Medicine |
| <b>Primary Subject Heading</b>: | Health services research                                                                                                                                                                                                                                                                                                                                                                                                                                                                                                                                                                                                                                                                                                                                                                                                                                                                                                                                                                                                                                                                                                                                                                                                                                                                                                                                     |
| Secondary Subject Heading:      | Palliative care                                                                                                                                                                                                                                                                                                                                                                                                                                                                                                                                                                                                                                                                                                                                                                                                                                                                                                                                                                                                                                                                                                                                                                                                                                                                                                                                              |
| Keywords:                       | Adult palliative care < PALLIATIVE CARE, Quality in health care < HEALTH SERVICES ADMINISTRATION & MANAGEMENT, Change management < HEALTH SERVICES ADMINISTRATION & MANAGEMENT                                                                                                                                                                                                                                                                                                                                                                                                                                                                                                                                                                                                                                                                                                                                                                                                                                                                                                                                                                                                                                                                                                                                                                               |
|                                 |                                                                                                                                                                                                                                                                                                                                                                                                                                                                                                                                                                                                                                                                                                                                                                                                                                                                                                                                                                                                                                                                                                                                                                                                                                                                                                                                                              |

SCHOLARONE™  
Manuscripts



I, the Submitting Author has the right to grant and does grant on behalf of all authors of the Work (as defined in the below author licence), an exclusive licence and/or a non-exclusive licence for contributions from authors who are: i) UK Crown employees; ii) where BMJ has agreed a CC-BY licence shall apply, and/or iii) in accordance with the terms applicable for US Federal Government officers or employees acting as part of their official duties; on a worldwide, perpetual, irrevocable, royalty-free basis to BMJ Publishing Group Ltd ("BMJ") its licensees and where the relevant Journal is co-owned by BMJ to the co-owners of the Journal, to publish the Work in this journal and any other BMJ products and to exploit all rights, as set out in our [licence](#).

The Submitting Author accepts and understands that any supply made under these terms is made by BMJ to the Submitting Author unless you are acting as an employee on behalf of your employer or a postgraduate student of an affiliated institution which is paying any applicable article publishing charge ("APC") for Open Access articles. Where the Submitting Author wishes to make the Work available on an Open Access basis (and intends to pay the relevant APC), the terms of reuse of such Open Access shall be governed by a Creative Commons licence – details of these licences and which [Creative Commons](#) licence will apply to this Work are set out in our licence referred to above.

Other than as permitted in any relevant BMJ Author's Self Archiving Policies, I confirm this Work has not been accepted for publication elsewhere, is not being considered for publication elsewhere and does not duplicate material already published. I confirm all authors consent to publication of this Work and authorise the granting of this licence.

1  
2  
3  
4  
5  
6  
7  
8  
9  
10  
11  
12  
13  
14  
15  
16  
17  
18  
19  
20  
21  
22  
23  
24  
25  
26  
27  
28  
29  
30  
31  
32  
33  
34  
35  
36  
37  
38  
39  
40  
41  
42  
43  
44  
45  
46  
47  
48  
49  
50  
51  
52  
53  
54  
55  
56  
57  
58  
59  
60

## Improving regional care in the last year of life by setting up a pragmatic evidence-based Plan-Do-Study-Act cycle: Results from a cross-sectional survey

**Raymond Voltz<sup>\*1,2,3,4</sup>, Gloria Dust<sup>\*1</sup>, Nicolas Schippel<sup>5</sup>, Stefanie Hamacher<sup>6</sup>, Sheila Payne<sup>7</sup>, Nadine Scholten<sup>5</sup>, Holger Pfaff<sup>4,5</sup>, Christian Rietz<sup>8</sup>, Julia Strupp<sup>1</sup>, on behalf of CoRe-Net**

<sup>1</sup>University of Cologne, Faculty of Medicine and University Hospital, Department of Palliative Medicine, Germany

<sup>2</sup>University of Cologne, Faculty of Medicine and University Hospital, Center for Integrated Oncology Aachen Bonn Cologne Dusseldorf (CIO ABCD), Germany

<sup>3</sup>University of Cologne, Faculty of Medicine and University Hospital, Clinical Trials Center (ZKS), Germany

<sup>4</sup>University of Cologne, Faculty of Medicine and University Hospital, Center for Health Services Research, Germany

<sup>5</sup>University of Cologne, Faculty of Human Sciences and Faculty of Medicine, Institute for Medical Sociology, Health Services Research, and Rehabilitation Science (IMVR), Germany

<sup>6</sup>University of Cologne, Faculty of Medicine and University Hospital, Institute of Medical Statistics and Computational Biology, Germany

<sup>7</sup>Lancaster University, Faculty of Health and Medicine, Division of Health Research, United Kingdom

<sup>8</sup>University of Education Heidelberg, Faculty of Educational and Social Sciences, Department of Educational Science, Germany

\* RV and GD contributed equally to this paper.

### Corresponding author:

Gloria Dust, University of Cologne, Faculty of Medicine and University Hospital, Department of Palliative Medicine, 50924 Cologne, Germany, gloria.dust@uk-koeln.de, +4922147887820

*I, the Submitting Author has the right to grant and does grant on behalf of all authors of the Work (as defined in the below author licence), an exclusive licence and/or a non-exclusive licence for contributions from authors who are: i) UK Crown employees; ii) where BMJ has agreed a CC-BY licence shall apply, and/or iii) in accordance with the terms applicable for US Federal Government officers or employees acting as part of their official duties; on a worldwide, perpetual, irrevocable, royalty-free basis to BMJ Publishing Group Ltd ("BMJ") its licensees and where the relevant Journal is co-owned by BMJ to the co-owners of the Journal, to publish the Work in BMJ Open and any other BMJ products and to exploit all rights, as set out in our licence.*



1  
2  
3 Words: 4357  
4

5 **Abstract** (Words: 287)  
6

7 **Objectives** To set up a pragmatic Plan-Do-Study-Act cycle by analysing patient experiences  
8 and determinants of satisfaction with care in the last year of life.  
9

10 **Design** Cross-sectional post-bereavement survey.  
11

12 **Setting** Regional health services research and development structure representing all health  
13 and social care providers involved in the last year of life in Cologne, a city with one million  
14 inhabitants in Germany.  
15  
16

17 **Participants** 351 bereaved relatives of adult decedents, representative for age and gender,  
18 accidental and suspicious deaths excluded.  
19  
20

21 **Results** For the majority (89%) of patients, home was the main place of care during their last  
22 year of life. Nevertheless, 91% of patients had at least one hospital admission and 42% died  
23 in hospital. Only 60% of informants reported that the decedent had been told that the disease  
24 was leading to death. Hospital physicians broke the news most often (58%), with their  
25 communication style often (30%) being rated as “not sensitive”. Informants indicated highly  
26 positive experiences with care provided by hospices (89% “good”) and specialist palliative  
27 home care teams (87% “good”). This proportion dropped to 41% for acute care hospitals, this  
28 rating being determined by the feeling of not being treated with respect and dignity (OR=23.80,  
29 CI=7.503 to 75.498) and the impression that hospitals did not work well together with other  
30 services (OR=8.37, CI=2.141 to 32.71).  
31  
32  
33  
34  
35  
36  
37

38 **Conclusions** Following those data, our regional priority for action now is improvement of care  
39 in acute hospitals, with two new projects starting, first how to recognise and communicate a  
40 limited life span, and second how to improve care during the dying phase. Results and further  
41 improvement projects will be discussed in a working group with the City of Cologne, and  
42 repeating this survey in two years will be able to measure regional achievements.  
43  
44  
45

46 **Trial registration** German Clinical Trials Register: DRKS00011925.  
47  
48  
49

50 **Keywords:** PDSA cycle, last year of life, satisfaction, hospital care, VOICES questionnaire  
51  
52  
53  
54  
55  
56  
57  
58  
59  
60

### Strengths and limitations of this study

- This study presents a multidimensional and comprehensive assessment of care provided in multiple settings in the entire last year of life.
- It describes a pragmatic template for determining regional improvement priorities based on patient experiences using a city-wide health services research and development structure (Plan-Do-Study-Act cycle).
- The reports of relatives cannot be seen as a direct substitute for a self-assessment of patients, although a good agreement has been shown on service evaluations and observable symptoms.
- The retrospective approach bypasses the difficult task of identifying the terminally ill, avoids putting an additional burden on very sick participants, and minimises missing data due to poor functional status.

### INTRODUCTION

Patients in their last year of life may be regarded as vulnerable because most of them need complex care provided by multiple health and social care practitioners.[1] Their needs are often not sufficiently met, especially in settings outside specialist palliative and hospice care.[2, 3] Due to the fact that they are often dependent on others to meet their physical care needs, they can deteriorate unpredictably and rapidly and their ability to make informed choices may be reduced due to cognitive impairment.[4] Care transitions as well as non-beneficial treatments are common, which may compromise human dignity and quality end-of-life care.[5, 6] In Germany, the evidence-based guideline “*Palliative care*” was published in 2015 to promote quality end-of-life care by all healthcare professionals. This aim may be achieved by “providing palliative care services in both a timely manner and in accordance with the affected persons’ needs, treating the common symptoms according to current scientific evidence and clinical expertise, enabling conversations with patients and their families to be held and treatment goals to be set together, ensuring that support in the dying phase can be appropriately and optimally given.”[7]

Evidence shows that most people prefer their home as place of death.[8] This also applies to Germany. However, almost one person in two dies in hospital and one third in care home.[9] Fragmentation of multidisciplinary service provision is one major barrier to adequately addressing patients’ needs and preferences.[10] Data on patients’ and their families’ perceptions are essential in order to understand these issues and to inform quality improvements. The last year of life can obviously only be objectively determined in retrospect, but it has to be managed prospectively. Adding palliative care in the last 12 to 24 months of life has proven to be greatly beneficial.[11, 12] Therefore, consideration also needs to be given

1  
2  
3 to the introduction of these services. However, the majority of surveys focuses on the dying  
4 phase or the last weeks to months of life and only a few studies have compared end-of-life  
5 care across different settings.[13-16] Care in the last year of life encompasses a wide range  
6 of services necessitating a multidimensional and comprehensive assessment approach.[14]  
7 This comprises the measurement of patients' experiences of the communication of a life-  
8 limiting disease ("transition into the last year of life"), transitions between health care settings  
9 ("transitions within the last year of life"), and the dying phase ("transition into death and a new  
10 phase of life for bereaved relatives"). For Germany, data on patients' perceptions of their  
11 experience of care in the last year of life that go beyond diagnoses and care settings are still  
12 rare.  
13

14  
15  
16  
17  
18  
19 Germany possesses a well-defined, government-led strategy for the development and  
20 promotion of national palliative care and performed well in the 2015 Quality of Death Index  
21 (position seven in the global rank of overall scores).[17] Based on the patients' needs, they  
22 may receive generalist palliative care (e.g. provided in a general hospital ward, a nursing home,  
23 by a general practitioner (GP) or a nursing service at home) or specialist palliative care  
24 provided by specialist personnel with expert knowledge, skills and attitudes (e.g. delivered in  
25 a hospital palliative care unit, a hospice or by a specialist palliative home care team). Hospice  
26 care in Germany refers to care provided in an in-patient facility. In addition, hospice services  
27 delivered by volunteers may support the patients and their families during illness and after a  
28 patient's death. All services and accommodations in these facilities are provided at no extra  
29 cost to the patient and are part of the service of the statutory as well as private health  
30 insurance. As in many other countries, the national level indicates the general direction in  
31 which the health care system is developing. However, for the patients and caregivers, the  
32 regional health care situation matters most, and this shows a lot of heterogeneity in  
33 Germany.[9] Due to this regional heterogeneity, this local level should be the driving force for  
34 innovation.[18, 19]  
35

36  
37  
38  
39  
40  
41  
42  
43  
44 Delivering improvements in the quality of healthcare remains an international challenge.  
45 Methods such as the Plan-Do-Study-Act (PDSA) cycle have been widely used in healthcare  
46 as an attempt to drive such improvements. The PDSA method is an iterative four-step cycle,  
47 which includes (1) identifying a change aimed at improvement, (2) testing this change, (3)  
48 examining the success of the change, and (4) identifying adaptations and next steps to inform  
49 a new cycle.[20] The fundamental principle is iteration (figure 1).[21, 22] To inform practice we  
50 need practical, but still evidence-based solutions which lead to "satisficing" decisions.[23-26]  
51  
52  
53  
54  
55  
56  
57  
58  
59  
60 Therefore, as a paradigm case for a one million inhabitant urban health care situation, this  
paper describes the set-up of a pragmatic quality improvement structure to improve regional  
end-of-life care. In particular, as the first step of the PDSA cycle we analyse patient

1  
2  
3 experiences across settings and providers and determinants of satisfaction with care in the  
4 last year of life as reported by bereaved relatives.  
5  
6  
7

8 *(Please insert here: Figure 1: Strategic learning process framed on the PDSA cycle)*  
9  
10  
11

## 12 **METHODS**

### 13 **Setting up the regional structure**

14 Initiated by three cooperating faculties (Human Sciences; Medicine; Management, Economics,  
15 and Social Sciences) of the University of Cologne, Germany, a regional health services  
16 research and development structure has been established involving as many relevant partners  
17 as possible from medical and social care as well as from health services research. The  
18 “Cologne Research and Development Network” (CoRe-Net)[27] focuses on the further  
19 development of health and social care according to the concept of learning organisations  
20 based on a bottom-up approach. Its main aim is to analyse and continuously improve  
21 healthcare delivery for vulnerable patient groups by going through PDSA cycles. We invited  
22 national and international scientific experts, regional health and social care institutions, patient  
23 organisations, and statutory health insurance providers to act as CoRe-Net collaboration  
24 partners. Within the network three research projects have been initiated, one focusing on  
25 patients in their last year of life. For this project entitled “Last Year of Life Study Cologne  
26 (LYOL-C)”[28] all health and social care practitioners involved in the care of patients in their  
27 last year of life (i.e., care homes, nursing services, hospices, bereavement cafés, doctors,  
28 hospitals, undertakers and the local public health department) as well as providers of grief  
29 work in Cologne were contacted for collaboration.  
30  
31  
32  
33  
34  
35  
36  
37  
38  
39  
40  
41

### 42 **Patient involvement**

43 Patient representatives were involved in the design and conduct of this research. They worked  
44 with us to refine the research question, choice of outcome measures, and methods of  
45 recruitment. In collaboration with patient representatives we will design a leaflet for  
46 dissemination to distributing to patient groups.  
47  
48  
49  
50  
51

### 52 **Sample and data collection**

53 Data were collected in a post-bereavement survey as part of the project LYOL-C. Participants  
54 were a purposive sample of relatives, friends and voluntary workers (all will be referred to as  
55 “informants” hereafter). Inclusion criteria required informants to be aged 18 years and older  
56 and to have recently cared for a person who lived their last year of life in the Cologne area.  
57 Deaths of people under the age of 18 as well as accidental and suspicious deaths were  
58  
59  
60

1  
2  
3 excluded. To ensure maximum variation, informants in this study were recruited in cooperation  
4 with health and social care practitioners from Cologne (partners from care homes, nursing  
5 services, hospices, bereavement cafés, doctors, hospitals, undertakers, local public health  
6 department). We applied two strategies between November 2017 and August 2018 to identify  
7 potential informants: i) Questionnaire distribution through cooperating care practitioners  
8 through client records by mail or personally. ii) Self-selection through public media (newspaper  
9 articles, flyers and posters): Informants who were interested in taking part in the survey could  
10 request a postal questionnaire from one of the researchers (GD); one reminder was sent. An  
11 information sheet describing the study's goals and a response form for opting out of the study  
12 were sent with the questionnaire. Informants gave written informed consent before taking part  
13 in the survey. All pseudonymously completed questionnaires were returned directly to the  
14 research team.  
15  
16  
17  
18  
19  
20  
21  
22  
23

### 24 **Questionnaire**

25 The self-complete questionnaire is based on the Views Of Informal Carers – Evaluation of  
26 Services-Short Form (VOICES-SF).[29] It is a validated questionnaire to assess the bereaved  
27 relatives' perceptions of the patient's care experiences with providers and services across care  
28 settings in the last three months of life. VOICES-SF was developed for a nationally  
29 representative cross-sectional survey to examine the quality of end-of-life care in England,  
30 conducted annually for five years (2011-2015),[30] and has already been used  
31 internationally.[3, 31-37]  
32

33 We developed an adapted German version ("VOICES-LYOL-Cologne") that covers the last  
34 twelve months of life and additionally includes the communication of the diagnosis of a life-  
35 limiting disease as well as places of care with periods of stay. The questionnaire comprises  
36 106 items and contains skip logic so that informants only respond to questions relevant to the  
37 care the patient received. For each specified setting/health care provider (home: nursing  
38 service, specialist palliative home care team, hospice service, GP, outpatient specialist  
39 physicians; care home; hospital (last admission), in-patient hospice), informants could rate  
40 their experiences with care on a 4-point scale with respect to the manner of communication,  
41 relief of pain, relief of other symptoms, coordination of care, care quality in the last two days of  
42 life (1=yes, 2=rather yes, 3=rather no, 4=no), respect and dignity (1=always, 2=most of the  
43 time, 3=some of the time, 4=never), and overall satisfaction (1=good, 2=rather good, 3=rather  
44 bad, 4=bad). The questionnaire further assesses communication of a life-limiting disease;  
45 carer support, unmet needs, financial needs, preferences and decision-making, place of death,  
46 bereavement support; disease-specific and socio-demographic data. Next the informants were  
47 asked to provide the settings in which the patients had received care during the last year of life  
48 (e.g. home, hospital, nursing home, hospice, rehabilitation clinic), and the period of time spent  
49  
50  
51  
52  
53  
54  
55  
56  
57  
58  
59  
60

per stay. Data was inserted in a table with chronological order. Objectivity, reliability and validity (content validity as well as divergent and convergent construct validity) were taken into consideration. The VOICES-LYOL-Cologne survey has been shown to be useful to assess the quality of care in the last year of life. [Dust et al. in preparation]

### Statistical analyses

Data were analysed descriptively and results are presented as mean  $\pm$  standard deviation (SD) and count (percentage), respectively. Differences in informants' ratings of care were tested using Mann-Whitney-U test for independent samples and Wilcoxon signed-rank test for paired samples.

Secondly, we performed a logistic regression analysis to explore factors associated with overall satisfaction with care provided in general hospital wards and intensive care units (ICU). All variables were dichotomised as applied in previous VOICES studies.[34, 38-40] The dependent variable ("Overall, do you feel that the care he/she got from the doctors in the hospital on that admission was: good, rather good, rather bad, bad?") was merged into the most positive response to the question vs. all other responses. The independent variables comprised socio-demographic variables of the deceased patients (age, gender, family situation, power of attorney) and variables concerning service provision (care by a specialist palliative home care team, treated with respect and dignity by the hospital doctors, relief of pain on last hospital admission, relief of other symptoms on last hospital admission, coordination of care on last hospital admission). First, univariable effect was tested. In a second step, all variables with  $p$ -value  $\leq 0.1$  were entered into a multivariable logistic regression model using a stepwise, forward selection procedure. Results are presented as odds ratios (OR), corresponding 95% confidence intervals (CI), and  $p$ -values.

Data were analysed using SPSS Statistics version 25 (IBM Corp., Armonk, NY, USA) and RStudio version 3.5.1 (RStudio Inc., Boston, MA, USA). Analyses were restricted to individuals with complete data on all variables required for a particular analysis. All presented  $p$ -values are two-sided and considered significant if  $p < 0.05$ .

## RESULTS

### Regional structure: The "Cologne Research and Development Network"

CoRe-Net has been established as a long-term and sustainable network, making Cologne a model region for the improvement of health and social care in Germany. Its members consist of three research projects and their collaboration partners. The interdisciplinary cooperation enables the integration of different perspectives and methods. Around 100 partners from health and social care services in Cologne collaborated in the subproject LYOL-C. They represented care homes, nursing services, hospices, bereavement cafés, doctors, hospitals, undertakers

and the local public health department. An initial meeting took place to consent the primary outcome and to discuss practical issues (e.g. recruitment).

### Survey sample

The questionnaire was returned by 365 informants. Response rate was 21.1% for postal distribution, 10.3% for personal distribution, and 74.9% for the self-selection group. A total of 14 questionnaires did not meet the inclusion criteria and had to be excluded. Characteristics of the patients and their informants are presented in table 1. For the 351 deceased patients, the majority of informants were a spouse or a child (81.8%), female (71.5%), and aged between 50 and 79 years (77.5%). Point in time of participation in the survey was  $7.6 \pm 4.9$  months after the patient's death. The sample of decedents comprises patients who died between December 2015 and July 2018. It was representative with respect to gender (47.9% male) and age ( $76.5 \pm 13.0$  years) compared with full data from the City of Cologne (gender: 50% male[41], age: 77.7 years[42]). The main underlying diseases were cancer (59.5%) and cardiovascular (40.5%), neuro-psychological (32.8%) and pulmonary (29.3%) diseases. One-third lived alone.

**Table 1: Demographics and characteristics of deceased patients and informants (N=351)**

|                                                 | <i>n</i> | (%)    |
|-------------------------------------------------|----------|--------|
| Deceased age at death (years)                   |          |        |
| 18-29                                           | 1        | (0.3)  |
| 30-49                                           | 6        | (1.7)  |
| 50-64                                           | 65       | (18.5) |
| 65-79                                           | 112      | (31.9) |
| 80+                                             | 167      | (47.6) |
| Deceased sex                                    |          |        |
| Male                                            | 168      | (47.9) |
| Female                                          | 183      | (52.1) |
| Deceased ethnic group                           |          |        |
| German                                          | 340      | (96.9) |
| Other                                           | 11       | (3.1)  |
| Deceased family situation <sup>a</sup>          |          |        |
| Had a partner                                   | 163      | (46.4) |
| Lived together with partner                     | 126      | (35.9) |
| Had children                                    | 168      | (47.9) |
| Lived together with children                    | 32       | (9.1)  |
| Lived together with someone else                | 21       | (6)    |
| Lived alone                                     | 114      | (32.5) |
| Someone else had a power of attorney            |          |        |
| Yes                                             | 311      | (88.6) |
| No                                              | 33       | (9.4)  |
| Do not know                                     | 7        | (2)    |
| Illnesses in the last year of life <sup>a</sup> |          |        |

|                                   |     |        |
|-----------------------------------|-----|--------|
| Cancer                            | 209 | (59.5) |
| Cardiovascular disease            | 142 | (40.5) |
| Neuro-psychological disease       | 115 | (32.8) |
| Disease of the respiratory system | 103 | (29.3) |
| Liver or kidney disease           | 67  | (19.1) |
| Diabetes mellitus                 | 45  | (12.8) |
| Decubitus ulcer                   | 24  | (6.8)  |
| Informant relation to deceased    |     |        |
| Spouse                            | 149 | (42.5) |
| Son/daughter                      | 138 | (39.3) |
| Sibling                           | 18  | (5.1)  |
| Son/daughter-in-law               | 9   | (2.6)  |
| Other relative                    | 17  | (4.8)  |
| Friend                            | 12  | (3.4)  |
| Other                             | 8   | (2.3)  |
| Informant age (years)             |     |        |
| 18-29                             | 2   | (0.6)  |
| 30-49                             | 46  | (13.1) |
| 50-64                             | 154 | (43.9) |
| 65-79                             | 118 | (33.6) |
| 80+                               | 31  | (8.8)  |
| Informant Sex                     |     |        |
| Male                              | 100 | (28.5) |
| Female                            | 251 | (71.5) |

<sup>a</sup> Multiple responses were possible.

### Transition into the last year of life

Two hundred and two (63.9%) of the informants reported that the patient had been told that the disease was leading to death, one-third (n=114, 36.1%) indicated that they had not been told. Of those who were told, 44 (22.8%) received this information less than a month before death, but one-third (n=63, 32.6%) more than a year before death. Hospital doctors were mentioned as breaking the news most often (n=112, 60.2%), followed by outpatient specialist physicians (n=29, 15.6%), close relatives (n=22, 11.8%), GPs (n=15, 8.1%), staff of the specialist palliative home care team (n=6, 3.2%), staff in the care home (n=1, 0.5%) and staff in a hospice (n=1, 0.5%).

### Transitions within the last year of life

Regarding the last year of life, most informants (n=310, 88.6%) reported that the deceased person spent some time at home and 75 (22.4%) some time in a care home. GPs (n=305, 87.4%) and outpatient specialist physicians (n=270, 77.1%) mainly provided outpatient care. Furthermore, 157 (45.1%) received care from a home nursing service, 135 (38.8%) from a specialist palliative home care team, and 23 (6.6%) were visited by a hospice service. For 224 (73%) patients the informant reported that urgent care provided out-of-hours was needed.



1  
2  
3 Furthermore, a total of 320 (91.4%) patients stayed in hospital at least once and almost one-  
4 fifth (n=64, 18.8%) in a hospice.

5  
6 On average, patients had  $3.72 \pm 3.1$  transitions between care settings in the last year of life.  
7  
8 Each of the five most frequent transitions included hospital care: home to hospital (47.2%),  
9 hospital to home (27.3%), care home to hospital (6.4%), hospital to hospital (6.4%), and  
10 hospital to care home (4.1%) (n=255). There was an increasing shift from home to the hospital  
11 as the main place of care near death. While 12 months prior to death patients spent 85.1% of  
12 their time at home and only 3.1% in hospital, in the final month of life they spent 46.3% of time  
13 at home and 30.2% in hospital (figure 2).  
14  
15  
16  
17  
18

19 *(Please insert here: Figure 2: Care settings in the last year of life in Cologne (N=255))*  
20  
21

### 22 **Transition into death**

23 42.2% (n=148) died in hospital, as opposed to only 4.2% (n=8) who wished to die there. 161  
24 (45.9%) relatives reported that the decedent did not express a preference for place of death or  
25 that they did not know the preference. The most preferred place of death was home (n=129,  
26 67.9%), and this wish was only fulfilled for 27.6% (n=97) of patients. Nevertheless, the majority  
27 of informants stated that the decedent died in the right place (n=294, 87.2%), although one-  
28 third reported that the patient did not have enough choice about where they died (n=94,  
29 32.1%).  
30  
31  
32  
33  
34  
35

### 36 **Perceived quality of and satisfaction with care in the last year of life**

37 Regarding informants' views of professionals' way of communicating a life-limiting disease,  
38 they were least satisfied with hospital doctors (table 2). Almost one-third stated that the hospital  
39 doctor did not communicate in a sensitive and caring way. Differences between ratings of the  
40 hospital doctor and non-hospital health care providers were statistically significant (p=0.003,  
41 n=156).  
42  
43  
44  
45

46 As examples of important quality indicators for care in the last year of life, table 2 further  
47 presents informants' ratings of perceived relief of pain and relief of other symptoms, as well as  
48 perceived coordination of care differentiated between care settings. It is notable that for  
49 symptom control both the home as well as acute hospital setting is rated the most poorly. Only  
50 45.5% of informants stated that pain relief was good at home and 43.6% during the last stay  
51 in a general hospital ward or ICU. Proportions were even lower for other symptoms with good  
52 relief at home reported by 31.8% and 32.2% in a general hospital ward or ICU. For perceived  
53 coordination of care the general hospital wards and ICUs rank worst by far with only one-  
54 quarter of informants (25.6%) who said that the hospital worked well together with other  
55 services outside of the hospital. Hospice care was best rated for all three aspects. 80% of  
56  
57  
58  
59  
60

informants reported good pain relief, 67.2% good relief of other symptoms, and 90% good coordination of care.

**Table 2: Informants' views of professionals' communication style, relief of pain, relief of other symptoms, and coordination of care between care settings in the last year of life**

| <i>Care setting</i>                                                         | <i>N<sup>a</sup></i> | <b>Overall rating</b>      |                                   |                                  |                           |
|-----------------------------------------------------------------------------|----------------------|----------------------------|-----------------------------------|----------------------------------|---------------------------|
|                                                                             |                      | <b>Yes</b><br><i>n (%)</i> | <b>Rather Yes</b><br><i>n (%)</i> | <b>Rather No</b><br><i>n (%)</i> | <b>No</b><br><i>n (%)</i> |
| <b>Communication of life-limiting disease in a sensitive and caring way</b> |                      |                            |                                   |                                  |                           |
| Hospice staff                                                               | 1                    | 0 (0)                      | 1 (100)                           | 0 (0)                            | 0 (0)                     |
| Specialist palliative home care team                                        | 5                    | 2 (40)                     | 2 (40)                            | 1 (20)                           | 0 (0)                     |
| Care home staff                                                             | 1                    | 1 (100)                    | 0 (0)                             | 0 (0)                            | 0 (0)                     |
| General practitioner                                                        | 14                   | 8 (57.1)                   | 6 (42.9)                          | 0 (0)                            | 0 (0)                     |
| Outpatient specialist                                                       | 25                   | 9 (36)                     | 11 (44)                           | 4 (16)                           | 1 (4)                     |
| Relative                                                                    | 19                   | 16 (84.2)                  | 3 (15.8)                          | 0 (0)                            | 0 (0)                     |
| Hospital doctor                                                             | 91                   | 34 (37.4)                  | 30 (33)                           | 13 (14.3)                        | 14 (15.4)                 |
| <b>Relief of pain</b>                                                       |                      |                            |                                   |                                  |                           |
| Hospice                                                                     | 60                   | 48 (80)                    | 10 (16.7)                         | 2 (3.3)                          | 0 (0)                     |
| Hospital: Palliative care unit                                              | 84                   | 51 (60.7)                  | 23 (27.4)                         | 7 (8.3)                          | 3 (3.6)                   |
| Care home                                                                   | 66                   | 33 (50)                    | 26 (39.4)                         | 7 (10.6)                         | 0 (0)                     |
| Homecare                                                                    | 246                  | 112 (45.5)                 | 91 (37)                           | 33 (13.4)                        | 10 (4.1)                  |
| Hospital: General ward/ICU                                                  | 188                  | 82 (43.6)                  | 78 (41.5)                         | 21 (11.2)                        | 7 (3.7)                   |
| <b>Relief of other symptoms</b>                                             |                      |                            |                                   |                                  |                           |
| Hospice                                                                     | 58                   | 39 (67.2)                  | 15 (25.9)                         | 3 (5.2)                          | 1 (1.7)                   |
| Hospital: Palliative care unit                                              | 84                   | 39 (46.4)                  | 31 (36.9)                         | 9 (10.7)                         | 5 (6)                     |
| Care home                                                                   | 60                   | 28 (46.7)                  | 24 (40)                           | 8 (13.3)                         | 0 (0)                     |
| Homecare                                                                    | 255                  | 81 (31.8)                  | 113 (44.3)                        | 41 (16.1)                        | 20 (7.8)                  |
| Hospital: General ward/ICU                                                  | 180                  | 58 (32.2)                  | 82 (45.6)                         | 31 (17.2)                        | 9 (5)                     |
| <b>Worked well together with other services</b>                             |                      |                            |                                   |                                  |                           |
| Hospice                                                                     | 50                   | 45 (90)                    | 3 (6)                             | 0 (0)                            | 2 (4)                     |
| Hospital: Palliative care unit                                              | 54                   | 35 (64.8)                  | 12 (22.2)                         | 4 (7.4)                          | 3 (5.6)                   |
| Care home                                                                   | 68                   | 43 (63.2)                  | 18 (26.5)                         | 4 (5.9)                          | 3 (4.4)                   |
| Homecare                                                                    | 244                  | 125 (51.2)                 | 72 (29.5)                         | 34 (13.9)                        | 13 (5.3)                  |
| Hospital: General ward/ICU                                                  | 133                  | 34 (25.6)                  | 24 (18)                           | 32 (24.1)                        | 43 (32.3)                 |

<sup>a</sup> Number of patients for whom the corresponding question was responded

ICU: Intensive care unit.

Accordingly, informants' perceived overall satisfaction with patient care over the whole last year of life varied significantly depending on the care setting (table 3a). Informants were more likely to rate care provided by hospices (89.1%) and the specialist palliative home care team

(86.8%) as “good”. Lower proportions of good ratings were given for the hospital palliative care units (68.5%), hospice services (68.4%), GPs (56.7%), care homes (50%), outpatient specialist physicians (47.6%), and nursing services (47.3%). They were least satisfied with the care provided in acute hospitals (general wards and ICUs), which was rated “good” by 41.3% and received the most “bad” (9.6%) ratings. We tested the differences in informants’ reports of satisfaction with acute hospital care versus all other health and social care practitioners (e.g. hospital general ward/ICU vs. hospice; table 3b). Differences were statistically significant in comparison to care provided by hospice ( $p=0.003$ ,  $n=41$ ), specialist palliative home care team ( $p<0.001$ ,  $n=76$ ), palliative care unit ( $p<0.001$ ,  $n=297$ ), home hospice service ( $p=0.033$ ,  $n=12$ ), and the GP ( $p=0.009$ ,  $n=179$ ).

**Table 3a: Informants’ overall satisfaction with care provided by health and social care practitioners in the last year of life**

| “Overall, how would you rate the care he/she got in the last year of life?” |                      |              |              |              |              |
|-----------------------------------------------------------------------------|----------------------|--------------|--------------|--------------|--------------|
|                                                                             |                      | Good         | Rather good  | Rather bad   | Bad          |
| <i>Care setting</i>                                                         | <i>N<sup>a</sup></i> | <i>n (%)</i> | <i>n (%)</i> | <i>n (%)</i> | <i>n (%)</i> |
| Hospice                                                                     | 64                   | 57 (89.1)    | 5 (7.8)      | 0 (0)        | 2 (3.1)      |
| Specialist palliative home care team                                        | 129                  | 112 (86.8)   | 13 (10.1)    | 2 (1.6)      | 2 (1.6)      |
| Hospital (doctor): Palliative care unit                                     | 89                   | 61 (68.5)    | 22 (24.7)    | 3 (3.4)      | 3 (3.4)      |
| Hospice service                                                             | 19                   | 13 (68.4)    | 6 (31.6)     | 0 (0)        | 0 (0)        |
| General practitioner                                                        | 282                  | 160 (56.7)   | 75 (26.6)    | 36 (12.8)    | 11 (3.9)     |
| Care home                                                                   | 72                   | 36 (50)      | 26 (36.1)    | 10 (13.9)    | 0 (0)        |
| Outpatient specialists                                                      | 229                  | 109 (47.6)   | 76 (33.2)    | 30 (13.1)    | 14 (6.1)     |
| Nursing service                                                             | 146                  | 69 (47.3)    | 59 (40.4)    | 15 (10.3)    | 3 (2.1)      |
| Hospital (doctor): General ward/ICU                                         | 208                  | 86 (41.3)    | 76 (36.5)    | 26 (12.5)    | 20 (9.6)     |

<sup>a</sup> Number of patients for whom the corresponding question was responded

ICU: Intensive care unit.

**Table 3b: Comparison of informants’ overall satisfaction with acute hospital care versus other health and social care practitioners**

| <i>Care setting</i> | Acute hospital care (general ward/ICU) vs. other care setting <sup>a</sup> |                            |
|---------------------|----------------------------------------------------------------------------|----------------------------|
|                     | <i>n</i>                                                                   | <i>p-value<sup>b</sup></i> |

|                                         |     |                      |
|-----------------------------------------|-----|----------------------|
| Hospice                                 | 41  | 0.021 <sup>b</sup>   |
| Specialist palliative home care team    | 76  | < 0.001 <sup>b</sup> |
| Hospital (doctor): Palliative care unit | 297 | < 0.001 <sup>c</sup> |
| Hospice service                         | 12  | 0.268 <sup>b</sup>   |
| General practitioner                    | 179 | 0.069 <sup>b</sup>   |
| Care home                               | 52  | 0.543 <sup>b</sup>   |
| Outpatient specialists                  | 135 | 1.0 <sup>b</sup>     |
| Nursing service                         | 101 | 0.679 <sup>b</sup>   |

<sup>a</sup> Compares informant's overall rating of the last hospital stay (doctor) in acute hospital setting (general ward or ICU) with the overall rating of every other care setting (e.g. hospital general ward/ICU vs. hospice).

<sup>b</sup> p-values are adjusted using Bonferroni correction for multiple comparisons.

<sup>c</sup> Wilcoxon signed-rank test for paired samples; comprises patients who experienced both forms of care.

<sup>d</sup> Mann-Whitney-U-Test; comprises patients who either received care in a hospital general ward/ICU or in a palliative care unit.

ICU: Intensive care unit

### Determinants of satisfaction with care in an acute hospital setting

Since care provided by general hospital wards and ICUs were rated worst compared to all other health and social care practitioners in the last year of life, we explored the determinants of satisfaction with care delivered in these hospital wards and units. Table 4 shows the results of the multivariable logistic regression analysis. Two variables were found to associate satisfaction with hospital care while all other variables did not reach significance any more. First, the model indicated that the feeling that the patient was treated with respect and dignity by the doctor was associated with an almost 24-fold increase in the likelihood of being satisfied. Second, the impression that the hospital worked well together with other services outside the hospital was associated with an 8-fold increase of being satisfied.

**Table 4: Logistic regression analysis of satisfaction with hospital care**

| <i>Variable</i>                                                        | <i>OR</i> | <i>(95% CI)</i>  | <i>p-value</i> |
|------------------------------------------------------------------------|-----------|------------------|----------------|
| Respect and dignity by the hospital doctor                             | 23.80     | (7.503 - 75.498) | <0.001         |
| Hospital worked well together with other services outside the hospital | 8.37      | (2.141 - 32.71)  | 0.002          |

Number of cases = 124; cases correctly classified = 85.5%; AUC = 0.904

## DISCUSSION

## Principal findings

This study is the first to our knowledge to set up a pragmatic PDSA cycle to improve regional care in the last year of life. Embedded in a regional health services research and development structure, we comprehensively analysed patient experiences with care in the last year of life from the bereaved relatives' perspectives. For symptom control both home as well as acute hospital setting was rated the most poorly. Hospitals were reported as the main player for diagnosing a progressive condition, for being involved in most transitions during the last year of life, and being the most frequent place of death despite all home palliative and hospice services available in Cologne. Yet, satisfaction was lowest with care provided in an acute hospital setting, which was determined by the feeling of not being treated with respect and dignity and the impression that hospitals did not work well together with other services. Based on this first step of the PDSA cycle, two interventions were developed to continue the cycle.

## Strengths and weaknesses

Most end-of-life care studies focus on a single care setting or are restricted to the dying phase, the last weeks of life or an underlying diagnosis. VOICES surveys include multiple settings to disaggregate findings according to specific setting type. Nevertheless, the instrument only evaluates the last three months of life.[29] Within this study, we utilised an adapted German version of the VOICES-SF, which was expanded to the last twelve months of life and included the communication of a life-limiting diagnosis. This instrument enables the reconstruction of the entire last year of life of patients, irrespective of the underlying diagnosis, to assess the provision and quality of care of all health and social care practitioners involved in patients' care. Our findings demonstrate the feasibility of collecting patient experiences reported by proxy-respondents across multiple care settings.

In Germany there is no national register available that could be used to identify participants. Therefore, a population-based survey was not feasible and the sample of decedents represented in this study was a purposive sample. Due to the recruitment strategy, patients from palliative care services are overrepresented. Nevertheless, it appropriately reflected the age and gender distribution of people dying in the City of Cologne.[41, 42]

We used a retrospective research design and asked bereaved relatives to act as proxies for the deceased patients. Relatives' reports of care experiences after the death of a loved one are an important outcome measure to determine the quality of end-of-life care.[14] This method is, of course, not without its limitations, especially in relation to memory, the impact of bereaved relatives' feelings, and the concordance between patient and proxy reports.[43, 44] A few studies examined these concerns and found that respondents were more accurate in recalling salient events and that satisfaction was mainly determined by service characteristics.[45, 46] A review on the validity of proxies' responses found that the level of agreement was good on

1  
2  
3 service evaluations and observable symptoms, but lower for subjective symptoms such as  
4 pain.[47] The retrospective approach has a long history in the conducting of end-of-life-care  
5 research. It bypasses the difficult task of identifying the terminally ill, avoids putting an  
6 additional burden on very sick participants, and minimises missing data due to poor functional  
7 status. It furthermore creates a clear time frame for the purpose of comparing settings of  
8 care.[48]

9  
10  
11  
12 The present study was conducted in Cologne, a city with one million inhabitants in Germany.  
13  
14 It is not clear whether these results are transferable to other regions, rural as well as urban  
15 areas. Nevertheless, this study describes a pragmatic template based on patient experiences  
16 (PDSA cycle) which can be used to determine improvement priorities by other regions.  
17  
18

### 19 20 **Comparison with existing literature**

21  
22 We found substantial differences in the reported satisfaction with care depending on the care  
23 setting. Informants were significantly more satisfied with quality of care provided in hospices  
24 compared to other care settings. Unfortunately, only a small number of patients will ever be  
25 admitted to hospice. In Germany, approximately 5% of patients, most of them cancer patients,  
26 die in hospice.[49] In the present study, home was the place where people spent most of their  
27 time during their last year of life. Informants reported of insufficient symptom control when  
28 being cared for at home. Reasons may include a lack of home care provider expertise, limits  
29 on service allocation, fragmentation of multidisciplinary services, and a considerable workload  
30 for many family practitioners with regards to home visit frequency and duration.[3, 10, 50-52]  
31 Hospitals were the most frequent place of death, with the highest levels of dissatisfaction.  
32 These results are similar to those from other VOICES studies carried out in Western  
33 countries.[1, 3, 32, 34] Previous studies also identified psychosocial rather than physical  
34 factors leading to dissatisfaction with care. A lack of personal care and dignity has been  
35 reported to cause patients to feel “devalued” or “dehumanised”. [53] Being involved in decisions  
36 and discussing any worries were also described as predictors of satisfaction with hospital  
37 care.[38] International studies have shown that there is still a discrepancy between current  
38 best practice recommendations and observed clinical reality; for example with regard to the  
39 recognition of a patient’s transition into the last year of life, identifying a patient’s palliative care  
40 needs, and aspects of shared decision making.[54] Reasons for this may lie in the obvious life-  
41 saving culture of hospitals where the norm is to prevent death by whatever means are  
42 necessary. Furthermore, it may also be due to the increasing time and cost pressure put on  
43 hospitals without these institutions having established standards for patients who will die within  
44 the foreseeable future.[55] Since almost 30% of all hospital patients are expected to be in their  
45 last year of life,[56] our findings stress the importance of a further integration of palliative care  
46 into acute care hospitals. Strategies for integrating palliative care into a country's health care  
47  
48  
49  
50  
51  
52  
53  
54  
55  
56  
57  
58  
59  
60

1  
2  
3 system have been developed. In 2007 the World Health Organization (WHO) published a  
4 public health strategy that includes advice and guidelines for governments on priorities and  
5 how to implement national palliative care programmes.[57] Furthermore, international experts  
6 in palliative care and cancer care formulated written statements regarding how integrated  
7 palliative care can be operationalised.[58] In Germany, the evidence-based guideline  
8 “*Palliative care*” was published in 2015 to promote quality end-of-life care by all healthcare  
9 professionals. This palliative care guideline presents the fundamental principles of palliative  
10 care which, in organ specific guidelines, would be repetitive and/or not able to be dealt with in  
11 a comprehensive manner.[7]

### 17 18 19 **Implications and future research**

20 In a regional working group on improvement of care in the last year of life, following those data,  
21 as regional priority for action improvement of care in acute hospitals was targeted. Two new  
22 projects have started, first how to recognise and communicate a limited life span (“Acute  
23 Hospital Program” by the Gold Standards Framework), and second how to improve care during  
24 the dying phase according to quality indicators of our national guideline [7, 59]. Results and  
25 further improvement projects will be discussed in this regional working group, and repeating  
26 this survey in two years will be able to – hopefully - measure regional achievements. This study  
27 starting a PDSA cycle can therefore serve as an example for determining regional  
28 improvement priorities based on patient experiences.

### 34 35 36 37 **DECLARATIONS**

38  
39  
40 **Contributors:** RV and GD are joint first authors and act as guarantors. RV, JS and CR are  
41 principal investigators and responsible for the study design, project management, data  
42 analysis and dissemination. GD and NiS designed the survey instrument and collected data.  
43 GD cleaned and analysed data. SH, SP, NaS and HP contributed to study design, data  
44 analysis and dissemination. HP is principal investigator of CoRe-Net. NaS coordinates  
45 CoRe-Net. All authors read and approved the final manuscript.

46  
47  
48  
49  
50  
51 **Ethics approval:** All procedures for this study were approved by the Ethics Commission of  
52 the Faculty of Medicine of the University of Cologne, Germany (#17-188). Participants gave  
53 written informed consent before taking part.

54  
55  
56  
57  
58  
59 **Funding:** This work was supported by the German Federal Ministry of Education and  
60 Research (BMBF), grant number #01GY1606.

1  
2  
3 **Competing interests:** None declared.  
4  
5

6 **Acknowledgements:** This study was made possible by the collaborative efforts of health and  
7 social care practitioners in Cologne. We further thank everyone who contributed their time and  
8 expertise, in particular the study participants, the CoRe-Net Co-applicants and our research  
9 assistant Christian von Reeken.  
10  
11  
12

13  
14 **Collaborators:** The CoRe-Net Co-applicants: Professor Dr Christian Albus, Department of  
15 Psychosomatics and Psychotherapy, Faculty of Medicine (FM), University Hospital Cologne  
16 (UHC); Professor Dr Lena Ansmann, Department of Health Services Research, School of  
17 Medicine and Health Sciences, Carl von Ossietzky University Oldenburg; Professor Dr Frank  
18 Jessen, Department of Psychiatry and Psychotherapy, FM, UHC; Professor Dr Ute Karbach,  
19 Sociology in Rehabilitation, Faculty of Rehabilitation, Technical University Dortmund;  
20 Professor Dr Ludwig Kuntz, Department of Business Administration and Health Care  
21 Management, Faculty of Management, Economics and Social Sciences (FMESS), University  
22 of Cologne (UoC); Dr Ingrid Schubert, PMV Health Care Research Group, FM, UoC; Professor  
23 Dr Frank Schulz-Nieswandt, Institute for Sociology and Social Psychology, FMESS, UoC;  
24 Professor Dr Stephanie Stock, Institute for Health Economics and Clinical Epidemiology, FM,  
25 UHC.  
26  
27  
28  
29  
30  
31  
32  
33  
34

35 **Data sharing:** Data are available upon reasonable request from the corresponding author.  
36  
37  
38  
39  
40  
41  
42  
43  
44  
45  
46  
47  
48  
49  
50  
51  
52  
53  
54  
55  
56  
57  
58  
59  
60



## References

1. Hanratty B, Lawson E, Grande G, et al. Transitions at the end of life for older adults – patient, carer and professional perspectives: a mixed-methods study. Southampton, UK: NIHR Journals Library 2014:130.
2. Addington-Hall JM, O'Callaghan AC. A comparison of the quality of care provided to cancer patients in the UK in the last three months of life in in-patient hospices compared with hospitals, from the perspective of bereaved relatives: results from a survey using the VOICES questionnaire. *Palliat Med* 2009;23:190–7.
3. Bainbridge D, Seow H. Palliative Care Experience in the Last 3 Months of Life: A Quantitative Comparison of Care Provided in Residential Hospices, Hospitals, and the Home From the Perspectives of Bereaved Caregivers. *Am J Hosp Palliat Care* 2018;35:456–63.
4. Addington-Hall JM, Bruera E, Higginson IJ, et al. Research Methods in Palliative Care. United States: Oxford University Press 2007.
5. Bone AE, Gao W, Gomes B, et al. Factors Associated with Transition from Community Settings to Hospital as Place of Death for Adults Aged 75 and Older: A Population-Based Mortality Follow-Back Survey. *J Am Geriatr Soc* 2016;64:2210–7.
6. Cardona-Morrell M, Kim JCH, Turner RM, et al. Non-beneficial treatments in hospital at the end of life: a systematic review on extent of the problem. *Int J Qual Health Care* 2016;28:456–69.
7. German Cancer Society, German Cancer Aid, AWMF. Palliative care for patients with incurable cancer, short version 2.0: AWMF-registration number 128/001OL 2019. <https://www.leitlinienprogramm-onkologie.de/leitlinien/palliativmedizin/> (accessed 5 Nov 2019).
8. Gomes B, Calanzani N, Gysels M, et al. Heterogeneity and changes in preferences for dying at home: a systematic review. *BMC Palliat Care* 2013;12:7.
9. Bertelsmann Stiftung. Palliative care: Available services do not (yet) meet patient needs - Expansion requires clear regulatory strategy: Spotlight Healthcare. Gütersloh: Bertelsmann Stiftung 2015.
10. Oishi A, Murtagh FEM. The challenges of uncertainty and interprofessional collaboration in palliative care for non-cancer patients in the community: a systematic review of views from patients, carers and health-care professionals. *Palliat Med* 2014;28:1081–98.
11. Temel JS, Greer JA, Muzikansky A, et al. Early Palliative Care for Patients with Metastatic Non-Small-Cell Lung Cancer. *N Engl J Med* 2010;363:733–42.
12. Smith TJ, Temin S, Alesi ER, et al. American Society of Clinical Oncology provisional clinical opinion: the integration of palliative care into standard oncology care. *J Clin Oncol* 2012;30:880–7.
13. Bainbridge D, Seow H. Measuring the Quality of Palliative Care at End of Life: An Overview of Data Sources. *Healthy Aging & Clinical Care in the Elderly* 2016;8:9–15.
14. Lendon JP, Ahluwalia SC, Walling AM, et al. Measuring Experience With End-of-Life Care: A Systematic Literature Review. *J Pain Symptom Manage* 2015;49:904-15.e1-3.
15. Mayland CR, Williams EMI, Ellershaw JE. How well do current instruments using bereaved relatives' views evaluate care for dying patients? *Palliat Med* 2008;22:133–44.
16. Kupeli N, Candy B, Tamura-Rose G, et al. Tools Measuring Quality of Death, Dying, and Care, Completed after Death: Systematic Review of Psychometric Properties. *Patient* 2019;12:183-97.
17. The Economist Intelligence Unit. The 2015 Quality of Death Index: Ranking palliative care across the world 2015.

<https://eiuperspectives.economist.com/sites/default/files/2015%20EIU%20Quality%20of%20Death%20Index%20Oct%2029%20FINAL.pdf> (accessed 5 Nov 2019).

18. Braithwaite J. Changing how we think about healthcare improvement. *BMJ* 2018;361:k2014.
19. Hämel K, Ewers M, Schaeffer D. Health care and regional disparities: [Article in German]. *Z Gerontol Geriatr* 2013;46:323–8.
20. Taylor MJ, McNicholas C, Nicolay C, et al. Systematic review of the application of the plan-do-study-act method to improve quality in healthcare. *BMJ Qual Saf* 2014;23:290–8.
21. Pietrzak M, Paliszkiwicz J. Framework of Strategic Learning: The PDCA Cycle. *Management* 2015;10:149–61.
22. Pfaff H, Zeike S. Controlling im Betrieblichen Gesundheitsmanagement: Das 7-Schritte-Modell. Wiesbaden: Gabler Verlag 2019.
23. Parker AM, Bruine de Bruin W, Fischhoff B. Maximizers versus satisficers: Decision-making styles, competence, and outcomes. *Judgment and Decision making* 2007;2:342–50.
24. Schwartz B, Ben-Haim Y, Dacso C. What Makes a Good Decision? Robust Satisficing as a Normative Standard of Rational Decision Making. *J Theory Soc Behav* 2011;41:209–27.
25. Simon HA. Rational decision making in business organizations. *The American economic review* 1979;66:493–513.
26. Simon HA. Making Management Decisions: the Role of Intuition and Emotion. *Academy of Management Perspectives* 1987;1:57–64.
27. Karbach U, Ansmann L, Scholten N, et al. Report from an ongoing research project: The Cologne Research and Development Network (CoRe-Net) and the value-based approach to healthcare.: [Article in German]. *Z Evid Fortbild Qual Gesundheitswes* 2018;130:21–6.
28. Strupp J, Hanke G, Schippel N, et al. Last Year of Life Study Cologne (LYOL-C): protocol for a cross-sectional mixed methods study to examine care trajectories and transitions in the last year of life until death. *BMJ open* 2018;8:e021211.
29. Hunt KJ, Richardson A, Darlington A-SE, et al. Developing the methods and questionnaire (VOICES-SF) for a national retrospective mortality follow-back survey of palliative and end-of-life care in England. *BMJ Support Palliat Care* 2017.
30. Office for National Statistics. National Survey of Bereaved People (VOICES): Information paper 2016:13.
31. Ross L, Neergaard MA, Petersen MA, et al. Measuring the quality of end-of-life care: Development, testing, and cultural validation of the Danish version of Views of Informal Carers' Evaluation of Services-Short Form. *Palliat Med* 2017;269216317740274.
32. Beccaro M, Caraceni A, Costantini M. End-of-life care in Italian hospitals: quality of and satisfaction with care from the caregivers' point of view--results from the Italian Survey of the Dying of Cancer. *J Pain Symptom Manage* 2010;39:1003–15.
33. Frey R, Williams L, Trussardi G, et al. The Views of Informal Carers' Evaluation of Services (VOICES): Toward an adaptation for the New Zealand bicultural context. *Palliat Support Care* 2017;15:67–76.
34. O'Sullivan A, Alvariza A, Öhlen J, et al. Bereaved Family Members' Satisfaction with Care during the Last Three Months of Life for People with Advanced Illness. *Healthcare (Basel)* 2018;6:E130.
35. Pungchompoo W, Suwan P, Kunapun S, et al. Experiences of symptoms and health service preferences among older people living with chronic diseases during the last year of life. *Int J Palliat Nurs* 2019;25:129–41.

- 1  
2  
3 36. Ingleton C, Morgan J, Hughes P, et al. Carer satisfaction with end-of-life care in  
4 Powys, Wales: a cross-sectional survey. *Health Soc Care Community* 2004;12:43–52.  
5  
6 37. Donnelly S, Prizeman G, Coimín DÓ, et al. Voices that matter: end-of-life care in two  
7 acute hospitals from the perspective of bereaved relatives. *BMC Palliat Care* 2018;17:117.  
8  
9 38. Young AJ, Rogers A, Dent L, et al. Experiences of hospital care reported by bereaved  
10 relatives of patients after a stroke: a retrospective survey using the VOICES questionnaire. *J*  
11 *Adv Nurs* 2009;65:2161–74.  
12  
13 39. Hunt KJ, Shlomo N, Addington-Hall J. End-of-life care and achieving preferences for  
14 place of death in England: results of a population-based survey using the VOICES-SF  
15 questionnaire. *Palliat Med* 2014;28:412–21.  
16  
17 40. Hunt KJ, Shlomo N, Addington-Hall J. End-of-life care and preferences for place of  
18 death among the oldest old: results of a population-based survey using VOICES-Short Form.  
19 *J Palliat Med* 2014;17:176–82.  
20  
21 41. Stadt Köln - Amt für Stadtentwicklung und Statistik. Kölner Statistische Nachrichten -  
22 1/2019: Statistisches Jahrbuch Köln 2018. Köln: Stadt Köln 2019.  
23  
24 42. Stadt Köln - Amt für Stadtentwicklung und Statistik. Kölner Zahlenspiegel. Köln: Stadt  
25 Köln 2018.  
26  
27 43. Baddeley AD. Human memory: Theory and practice. Boston, MA: Allyn and Bacon  
28 1990:515.  
29  
30 44. Bower GH. Mood and memory. *Am Psychol* 1981;36:129–48.  
31  
32 45. Fakhoury W, McCarthy M, Addington-Hall J. Determinants of informal caregivers'  
33 satisfaction with services for dying cancer patients. *Soc Sci Med* 1996;42:721–31.  
34  
35 46. Mathiowetz NA. Forgetting Events in autobiographical memory: Findings from a  
36 health care survey Rockville1988.  
37 [http://www.asasrms.org/Proceedings/papers/1988\\_029.pdf](http://www.asasrms.org/Proceedings/papers/1988_029.pdf) (accessed 5 Nov 2019).  
38  
39 47. McPherson CJ, Addington-Hall JM. Judging the quality of care at the end of life: can  
40 proxies provide reliable information? *Soc Sci Med* 2003;56:95–109.  
41  
42 48. Teno JM. Measuring end-of-life care outcomes retrospectively. *J Palliat Med* 2005;8  
43 Suppl 1:S42-9.  
44  
45 49. Dasch B, Blum K, Gude P, et al. Place of Death: Trends Over the Course of a  
46 Decade: A Population-Based Study of Death Certificates From the Years 2001 and 2011.  
47 *Dtsch Arztebl Int* 2015;112:496–504.  
48  
49 50. Bainbridge D, Brazil K, Krueger P, et al. Evaluating program integration and the rise  
50 in collaboration: case study of a palliative care network. *J Palliat Care* 2011;27:270-8.  
51  
52 51. Bee PE, Barnes P, Luker KA. A systematic review of informal caregivers' needs in  
53 providing home-based end-of-life care to people with cancer *J Clin Nurs* 2009;18:1379-93.  
54  
55 52. Pochert M, Voigt K, Bortz M, et al. The workload for home visits by German family  
56 practitioners: an analysis of regional variation in a cross-sectional study. *BMC Fam Pract*  
57 2019;20.  
58  
59 53. Rogers A, Karlsen S, Addington-Hall J. 'All the services were excellent. It is when the  
60 human element comes in that things go wrong': dissatisfaction with hospital care in the last  
year of life. *J Adv Nurs* 2000;31:768–74.  
54  
55 54. Milnes S, Orford NR, Berkeley L, et al. A prospective observational study of  
prevalence and outcomes of patients with Gold Standard Framework criteria in a tertiary  
regional Australian Hospital. *BMJ Support Palliat Care* 2019;9:92–9.  
56  
57 55. Gott M, Ingleton C, Bennett MI, et al. Transitions to palliative care in acute hospitals in  
England: qualitative study. *BMJ* 2011;342:d1773.

1  
2  
3 56. Clark D, Armstrong M, Allan A, et al. Imminence of death among hospital inpatients:  
4 Prevalent cohort study. *Palliat Med* 2014;28:474–9.

5  
6 57. Stjernswärd J, Foley KM, Ferris FD. The public health strategy for palliative care. *J*  
7 *Pain Symptom Manage* 2007;33:486–93.

8  
9 58. Payne S, Hughes S, Wilkinson J, et al. Recommendations on priorities for integrated  
10 palliative care: transparent expert consultation with international leaders for the InSuP-C  
11 project. *BMC Palliat Care* 2019;18:32.

12  
13 59. The Gold Standards Framework. Acute Hospital Programme: Summary of Evidence  
14 of Effectiveness 2016. [http://www.goldstandardsframework.org.uk/cd-](http://www.goldstandardsframework.org.uk/cd-content/uploads/files/GSF%20Summary%20of%20Evaluation%20%20Acute%20Hospitals%20Sept%202016%281%29.pdf)  
15 [content/uploads/files/GSF%20Summary%20of%20Evaluation%20%20Acute%20Hospitals%](http://www.goldstandardsframework.org.uk/cd-content/uploads/files/GSF%20Summary%20of%20Evaluation%20%20Acute%20Hospitals%20Sept%202016%281%29.pdf)  
16 [20Sept%202016%281%29.pdf](http://www.goldstandardsframework.org.uk/cd-content/uploads/files/GSF%20Summary%20of%20Evaluation%20%20Acute%20Hospitals%20Sept%202016%281%29.pdf) (accessed 5 Nov 2019).

17  
18  
19  
20  
21  
22  
23  
24  
25  
26  
27  
28  
29  
30  
31  
32  
33  
34  
35  
36  
37  
38  
39  
40  
41  
42  
43  
44  
45  
46  
47  
48  
49  
50  
51  
52  
53  
54  
55  
56  
57  
58  
59  
60

For peer review only

1  
2  
3 **FIGURES**

4  
5 **Figure 1: Strategic learning process framed on the PDSA cycle**

6  
7 *(based on Pfaff and Zeike (2019))*

8  
9 **Figure 2: Care settings in the last year of life in Cologne (N=255)**

10  
11  
12  
13  
14  
15  
16  
17  
18  
19  
20  
21  
22  
23  
24  
25  
26  
27  
28  
29  
30  
31  
32  
33  
34  
35  
36  
37  
38  
39  
40  
41  
42  
43  
44  
45  
46  
47  
48  
49  
50  
51  
52  
53  
54  
55  
56  
57  
58  
59  
60

For peer review only

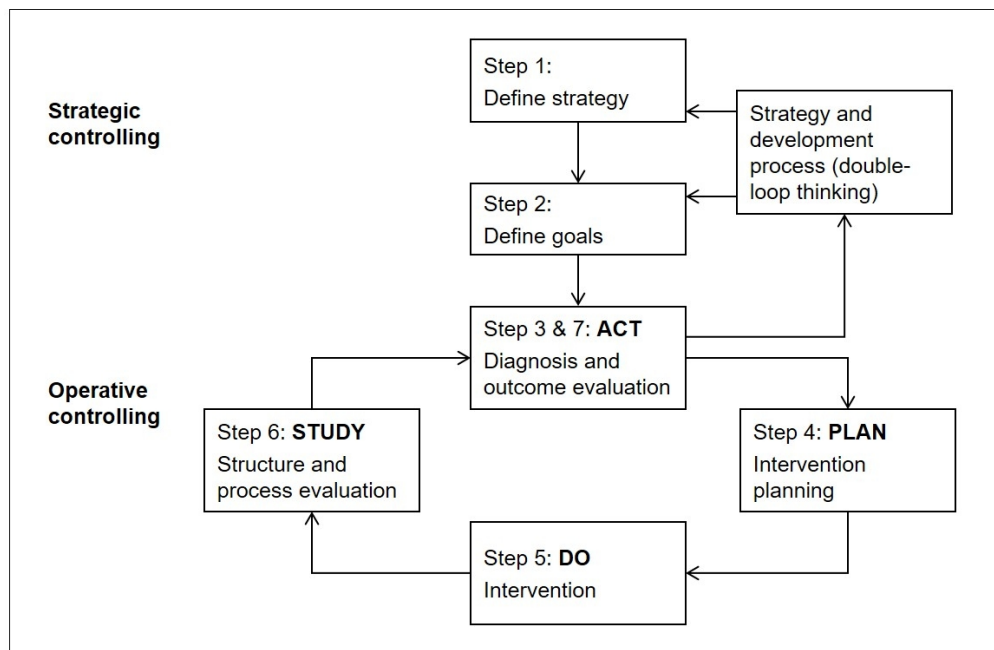

Based on Pfaff and Zeike (2019).<sup>22</sup>

Figure 1: Strategic learning process framed on the PDSA cycle (based on Pfaff and Zeike (2019))

97x70mm (300 x 300 DPI)

1  
2  
3  
4  
5  
6  
7  
8  
9  
10  
11  
12  
13  
14  
15  
16  
17  
18  
19  
20  
21  
22  
23  
24  
25  
26  
27  
28  
29  
30  
31  
32  
33  
34  
35  
36  
37  
38  
39  
40  
41  
42  
43  
44  
45  
46  
47  
48  
49  
50  
51  
52  
53  
54  
55  
56  
57  
58  
59  
60



Figure 2: Care settings in the last year of life in Cologne (N=255)  
111x65mm (300 x 300 DPI)

STROBE Statement—Checklist of items that should be included in reports of *cross-sectional studies*

|                              | Item No | Recommendation                                                                                                                                                                                               | Page No |
|------------------------------|---------|--------------------------------------------------------------------------------------------------------------------------------------------------------------------------------------------------------------|---------|
| <b>Title and abstract</b>    | 1       | (a) Indicate the study's design with a commonly used term in the title or the abstract                                                                                                                       | 1, 2    |
|                              |         | (b) Provide in the abstract an informative and balanced summary of what was done and what was found                                                                                                          | 2       |
| <b>Introduction</b>          |         |                                                                                                                                                                                                              |         |
| Background/rationale         | 2       | Explain the scientific background and rationale for the investigation being reported                                                                                                                         | 3, 4    |
| Objectives                   | 3       | State specific objectives, including any prespecified hypotheses                                                                                                                                             | 5       |
| <b>Methods</b>               |         |                                                                                                                                                                                                              |         |
| Study design                 | 4       | Present key elements of study design early in the paper                                                                                                                                                      | 5       |
| Setting                      | 5       | Describe the setting, locations, and relevant dates, including periods of recruitment, exposure, follow-up, and data collection                                                                              | 5,6     |
| Participants                 | 6       | (a) Give the eligibility criteria, and the sources and methods of selection of participants                                                                                                                  | 5       |
| Variables                    | 7       | Clearly define all outcomes, exposures, predictors, potential confounders, and effect modifiers. Give diagnostic criteria, if applicable                                                                     | 6       |
| Data sources/<br>measurement | 8*      | For each variable of interest, give sources of data and details of methods of assessment (measurement). Describe comparability of assessment methods if there is more than one group                         | 6       |
| Bias                         | 9       | Describe any efforts to address potential sources of bias                                                                                                                                                    | 6       |
| Study size                   | 10      | Explain how the study size was arrived at                                                                                                                                                                    | 5,6     |
| Quantitative variables       | 11      | Explain how quantitative variables were handled in the analyses. If applicable, describe which groupings were chosen and why                                                                                 | 7       |
| Statistical methods          | 12      | (a) Describe all statistical methods, including those used to control for confounding                                                                                                                        | 7       |
|                              |         | (b) Describe any methods used to examine subgroups and interactions                                                                                                                                          | 7       |
|                              |         | (c) Explain how missing data were addressed                                                                                                                                                                  | 7       |
|                              |         | (d) If applicable, describe analytical methods taking account of sampling strategy                                                                                                                           | /       |
|                              |         | (e) Describe any sensitivity analyses                                                                                                                                                                        | /       |
| <b>Results</b>               |         |                                                                                                                                                                                                              |         |
| Participants                 | 13*     | (a) Report numbers of individuals at each stage of study—eg numbers potentially eligible, examined for eligibility, confirmed eligible, included in the study, completing follow-up, and analysed            | 7,8     |
|                              |         | (b) Give reasons for non-participation at each stage                                                                                                                                                         | 7,8     |
|                              |         | (c) Consider use of a flow diagram                                                                                                                                                                           | /       |
| Descriptive data             | 14*     | (a) Give characteristics of study participants (eg demographic, clinical, social) and information on exposures and potential confounders                                                                     | 8,9     |
|                              |         | (b) Indicate number of participants with missing data for each variable of interest                                                                                                                          | 9-14    |
| Outcome data                 | 15*     | Report numbers of outcome events or summary measures                                                                                                                                                         | 9-14    |
| Main results                 | 16      | (a) Give unadjusted estimates and, if applicable, confounder-adjusted estimates and their precision (eg, 95% confidence interval). Make clear which confounders were adjusted for and why they were included | 12-14   |



|                          |    |                                                                                                                                                                            |       |
|--------------------------|----|----------------------------------------------------------------------------------------------------------------------------------------------------------------------------|-------|
|                          |    | (b) Report category boundaries when continuous variables were categorized                                                                                                  | /     |
|                          |    | (c) If relevant, consider translating estimates of relative risk into absolute risk for a meaningful time period                                                           | /     |
| Other analyses           | 17 | Report other analyses done—eg analyses of subgroups and interactions, and sensitivity analyses                                                                             | /     |
| <b>Discussion</b>        |    |                                                                                                                                                                            |       |
| Key results              | 18 | Summarise key results with reference to study objectives                                                                                                                   | 14    |
| Limitations              | 19 | Discuss limitations of the study, taking into account sources of potential bias or imprecision. Discuss both direction and magnitude of any potential bias                 | 14,15 |
| Interpretation           | 20 | Give a cautious overall interpretation of results considering objectives, limitations, multiplicity of analyses, results from similar studies, and other relevant evidence | 14,15 |
| Generalisability         | 21 | Discuss the generalisability (external validity) of the study results                                                                                                      | 14,15 |
| <b>Other information</b> |    |                                                                                                                                                                            |       |
| Funding                  | 22 | Give the source of funding and the role of the funders for the present study and, if applicable, for the original study on which the present article is based              | 16    |

\*Give information separately for exposed and unexposed groups.

**Note:** An Explanation and Elaboration article discusses each checklist item and gives methodological background and published examples of transparent reporting. The STROBE checklist is best used in conjunction with this article (freely available on the Web sites of PLoS Medicine at <http://www.plosmedicine.org/>, Annals of Internal Medicine at <http://www.annals.org/>, and Epidemiology at <http://www.epidem.com/>). Information on the STROBE Initiative is available at [www.strobe-statement.org](http://www.strobe-statement.org).
